# Supplementary material for: Drivers for successful long-term lifestyle change, the role of e-health: a qualitative interview study
Source: PubMed Central journal article supplement — BMJ Open. 2018 Mar 12;8(3):e017466. doi: 10.1136/bmjopen-2017-017466 (PMC5857693; doi:10.1136/bmjopen-2017-017466), 2018-03-12
Supplement: bmjopen-2017-017466.draft_revisions.pdf [file bmjopen-2017-017466.draft_revisions.pdf]

# BMJ Open

BMJ Open is committed to open peer review. As part of this commitment we make the peer review history of every article we publish publicly available.

When an article is published we post the peer reviewers' comments and the authors' responses online. We also post the versions of the paper that were used during peer review. These are the versions that the peer review comments apply to.

The versions of the paper that follow are the versions that were submitted during the peer review process. They are not the versions of record or the final published versions. They should not be cited or distributed as the published version of this manuscript.

BMJ Open is an open access journal and the full, final, typeset and author-corrected version of record of the manuscript is available on our site with no access controls, subscription charges or pay-per-view fees (<http://bmjopen.bmj.com>).

If you have any questions on BMJ Open's open peer review process please email [info.bmjopen@bmj.com](mailto:info.bmjopen@bmj.com)

# BMJ Open

## Drivers for successful long-term lifestyle change, the role of e-health: a qualitative interview study

|                                 |                                                                                                                                                                                                                                                                                                                                                                                                                                                                                                                                                           |
|---------------------------------|-----------------------------------------------------------------------------------------------------------------------------------------------------------------------------------------------------------------------------------------------------------------------------------------------------------------------------------------------------------------------------------------------------------------------------------------------------------------------------------------------------------------------------------------------------------|
| Journal:                        | <i>BMJ Open</i>                                                                                                                                                                                                                                                                                                                                                                                                                                                                                                                                           |
| Manuscript ID                   | bmjopen-2017-017466                                                                                                                                                                                                                                                                                                                                                                                                                                                                                                                                       |
| Article Type:                   | Research                                                                                                                                                                                                                                                                                                                                                                                                                                                                                                                                                  |
| Date Submitted by the Author:   | 28-Aug-2017                                                                                                                                                                                                                                                                                                                                                                                                                                                                                                                                               |
| Complete List of Authors:       | Brandt, Carl; Syddansk Universitet Det Sundhedsvidenskabelige Fakultet, Research unit for General practice, Department for public health<br>Clemensen, Jane; Syddansk Universitet Det Sundhedsvidenskabelige Fakultet, CIMT- Centre for Innovative Medical Technology<br>Nielsen, Jesper; Syddansk Universitet Det Sundhedsvidenskabelige Fakultet, Research Unit of General Practice, Dept. of Public Health<br>Søndergaard, Jens; National Research Centre for Cancer Rehabilitation, Research Unit of General Practice, University of Southern Denmark |
| <b>Primary Subject Heading</b>: | General practice / Family practice                                                                                                                                                                                                                                                                                                                                                                                                                                                                                                                        |
| Secondary Subject Heading:      | Patient-centred medicine, Qualitative research, Diabetes and endocrinology, Communication                                                                                                                                                                                                                                                                                                                                                                                                                                                                 |
| Keywords:                       | behavioral outcome, weight loss, behavioral change support system, Telemedicine < BIOTECHNOLOGY & BIOINFORMATICS, lifestyle change, obesity                                                                                                                                                                                                                                                                                                                                                                                                               |
|                                 |                                                                                                                                                                                                                                                                                                                                                                                                                                                                                                                                                           |

SCHOLARONE™  
Manuscripts

only

1  
2  
3  
4  
5  
6  
7  
8  
9  
10  
11  
12  
13  
14  
15  
16  
17  
18  
19  
20  
21  
22  
23  
24  
25  
26  
27  
28  
29  
30  
31  
32  
33  
34  
35  
36  
37  
38  
39  
40  
41  
42  
43  
44  
45  
46  
47  
48  
49  
50  
51  
52  
53  
54  
55  
56  
57  
58  
59  
60

## Drivers for successful long-term lifestyle change, the role of e-health: a qualitative interview study

**Corresponding author: Carl J. Brandt, MD, GP**  
Research Unit of General Practice, Dept. of Public Health  
University of Southern Denmark  
Odense, Denmark  
e-mail: cbrandt@health.sdu.dk

Jane Clemensen NC, PhD, head of department  
CIMT- Centre for Innovative Medical Technology  
University of Southern Denmark  
Odense, Denmark  
e-mail: Jane.Clemensen@rsyd.dk

Jesper Bo Nielsen, Professor PhD  
Research Unit of General Practice, Dept. of Public Health  
University of Southern Denmark  
Odense, Denmark  
e-mail: jbn Nielsen@health.sdu.dk

Jens Søndergaard, MD, Professor, PhD  
Research Unit of General Practice, Dept. of Public Health  
University of Southern Denmark  
Odense, Denmark  
e-mail: jsoendergaard@health.sdu.dk

### ABSTRACT

**Objectives:** In a prospective pilot study of weight loss among overweight patients, we recently found a 7.0 kg mean weight loss within a 20 months' intervention period using an online e-health approach in a general practice care setting. In order to further improve the intervention by achieving a deeper understanding of the user perspective, we conducted a qualitative interview study.

**Design:** Qualitative, semi-structured, individual interviews.

**Setting:** General practice in the Region of Southern Denmark.

**Participants:** Ten overweight patients who had previously used the online Internet e-health intervention.

**Results:** The main theme identified was a trustworthy relationship with the health professionals and/or supportive peers, friends and family. It was important to monitor the behavioural change with feedback from a trusted person, and significant life events were identified often to ignite the successful long-term lifestyle changes. The primary barriers were the perception of insurmountable obstacles, experience of lack of self-efficacy and/or excess eating of high calorie food.

1  
2  
3  
4 **Conclusion:** Most important was a strong relationship with a health professional. E-health  
5 could support the relationship and provide behavioural change through monitoring and  
6 empathic relevant feedback. The support from friends and family matters, and long-term  
7 success depends on the ability to establish a strong positive support on a day-to-day basis.  
8

## 9 **Strengths and limitations of this study**

- 11 • This is the first qualitative research study exploring drivers for long-term lifestyle change  
12 using an online e-health approach in general practice successfully.
- 13 • The findings of this study are relevant and generalizable to future e-health solutions.
- 14 • The main limitation of the study is the lack of methodological triangulation.  
15

## 16 **BACKGROUND**

17 Many chronic diseases, such as diabetes, cardiovascular diseases, cancer and COPD, are  
18 caused or aggravated by common preventable risk factors, e.g. tobacco use, unhealthy diet,  
19 and physical inactivity. We found that an Internet solution could support a significant weight  
20 loss during a 20 months' period (V. Brandt et al., 2011). The solution provided various  
21 behavioural change elements as tailored information, self-monitoring, lifestyle coaching, in-  
22 person feedback, reminders, and person-to-person support. But the important drivers for  
23 such a lifestyle change and what role the Internet solution played have not previously been  
24 addressed.  
25

26  
27  
28  
29 Recent systematic reviews concluded that Internet and mobile interventions can improve  
30 lifestyle behaviours, and that most studies had no more than three months' follow up, and  
31 emphasized the need for long-term interventions (Afshin et al., 2016), (Hartmann - Boyce,  
32 Johns, Jebb, & Aveyard, 2014), (Sherrington et al., 2016). Papers on practice care (PC) (Levine,  
33 Savarimuthu, Squires, Nicholson, & Jay, 2015) found that studies involving clinician-guided  
34 software or feedback from personnel appeared to promote more weight loss, but overall best  
35 practice remains undetermined especially with regard to adherence and factors important for  
36 a long-term successful lifestyle change. We therefore need to analyse how to see the patient  
37 acting "as knowing" and not "by knowing" (Storni, 2015) and acknowledge the complexities  
38 and ambivalences that are part of using self-monitoring and self-care technologies for  
39 monitoring health (Lupton, 2013).  
40

41  
42  
43 In a prospective pilot study, we investigated the effect of interactive dietician lifestyle  
44 coaching combined with access to online person-to-person support using an existing  
45 commercial online Internet weight loss management program not using app technology [1].  
46 We have previously described the usability of this platform and found a mean weight loss  
47 from baseline of 7.0 kg. (V. Brandt et al., 2011)  
48

49  
50 Other studies have shown similar results (Appel et al., 2011), but the results are  
51 heterogeneous (Levine et al., 2015). Teams with both medical doctors and lifestyle coaches  
52 seemed more disperse in their results averaging a little lower than teams with only lifestyle  
53 coaches. The use of behaviour change elements as self-monitoring with personnel feedback  
54 also seemed important compared to automated response feedback that only gave positive  
55 outcome in one of four studies (Levine et al., 2015). In accordance with the social cognitive  
56 theory (SCT), physical outcome expectations and proximal goal setting are important  
57 (Bandura 2004).  
58  
59  
60

1  
2  
3  
4 We therefore anticipate that the outcome expectations and goal setting need to be developed  
5 in collaboration between a coaching health professional and the patient, to have a longer  
6 lasting effect for the patient. The Internet and Facebook have changed our social patterns, and  
7 it has become possible to build relationships via digital solutions. Some studies suggest that  
8 certain groups of patients might benefit from this (Winzelberg et al., 2003).  
9

10  
11 In this paper, we report results from a qualitative interview study to identify factors of  
12 importance for weight loss management for patients who were offered the digital support  
13 system and have first hand experience in digital support and long-term successful lifestyle  
14 change. We explore: 1. What are the incitements and barriers to personal lifestyle changes in  
15 general and when using e-health solutions? 2. What is the role of peers and health  
16 professionals when changing lifestyle in general and when using e-health solutions seen from  
17 a patient perspective?  
18  
19

## 20 21 **METHODS**

### 22 **Context**

23 Qualitative, semi-structured, individual interviews

24 Setting: general practice in the Region of Southern Denmark.

25 Participants: ten overweight patients, three men and seven women, age 34 to 71, average age  
26 52, with an average weight of 109 kg, who had previously been invited to use an online  
27 complex Internet e-health intervention were found by purposive sampling. They had each lost  
28 a median of 10.5 kg during the 20 months study period. Invitation was done by phone and  
29 none declined the invitation.  
30

31 The intervention tool was used as a supplement to a dietician working in general practice  
32 while making sure that the relationship was established in person before beginning the online  
33 communication. The same dietician met the patient in the clinic and handled the online  
34 lifestyle coaching with the patient. Apart from the dietician, the patients could meet and share  
35 health data/information with other patients in the online forums established through the  
36 intervention tool[1]. This developed into a strong community, where it was possible for the  
37 patients also to discuss many personal issues (V. Brandt et al., 2011).  
38  
39

40 The present interviews took place 5 years after the end of the initial intervention. All patients  
41 were interviewed with for 45 min to 1 hour in their home except for two who was  
42 interviewed in the medical centre. Nobody else were present in the room of the interview  
43 during the interview. We chose a phenomenological approach in seeking to explore the  
44 experiences of participants in the long-term successful digital based intervention (V. Brandt et  
45 al., 2011). Sampling  
46  
47

48 The semi-structured interviews were segmented into four fields of interest:

- 49 1. Patient disease history,
- 50 2. Patients' experiences in taking action to change lifestyle,
- 51 3. Patients' experiences with support from health professionals and peers,
- 52 4. Patients' experiences with and thoughts about e-health solutions.

53 The interview guide was tested among family and colleagues prior to use. All interviews were  
54 audiotaped and performed by CJB, who is a general practitioner and has worked with  
55  
56  
57  
58  
59  
60

different e-health solutions for more than 15 years. Field notes were made during and right after the interviews.

### Analysis

Interviews were transcribed after each interview and uploaded to a common database. Transcripts were analysed by the researchers (CJB, JC, JBN and JS) using thematic analysis and data saturation were met. The identified themes were compared between the different researchers. Overlap and consistency were reached. The findings were then related to the Social Action Theory (SAT) (Ewart, 2009), the Theory of Triadic Influence (TTI) (Flay et al., 2009) and the Social Cognitive Theory (SCT) (Bandura, 2004). Coinciding themes of importance were then put into a common framework to try to establish an understanding of the identified drivers in relation to psychosocial determinants for health behaviour.

## RESULTS

All but one of the participants used smartphones or tablets. One only used a traditional cell phone and had his wife entering data via a computer. They all used apps and the Internet, but no longer had access to the intervention tool [1]. Five years after the initial intervention, they all still used the Internet or apps for benefitting their health. Everyone looked up recipes, some had joined weight loss Facebook groups, and some used an app service monitoring their physical activity. They were not aware of all the functionality that could support them for free using their smartphones, but the majority acknowledged that the provided e-health solution had helped them during the intervention period. Following the two years intervention study five years ago, some had gained weight, but not to the level before the intervention.

Table 1. Summary of main themes

| Incitement/facilitators                                                             | Impediments/barriers                           | Role of family and friends                                       |
|-------------------------------------------------------------------------------------|------------------------------------------------|------------------------------------------------------------------|
| 1.1 The trustworthy relationship to the health professional                         | 2.1 The perception of insurmountable obstacles | 3.1 Experience of honest and trustworthy person-to-person forums |
| 1.2 Monitoring the behavioral change with lifestyle coaching from a referent person | 2.2 Experience of lack of self-efficacy        | 3.2 Need of acknowledgement from referent others                 |
| 1.3 Goal setting                                                                    | 2.3 Excess eating of high calorie food         | 3.3 Support from spouse/partner and family                       |
| 1.4 Experiencing significant life events                                            |                                                |                                                                  |

### Incitements/facilitators for lifestyle change

**The establishment of an honest and trustworthy relationship to a health professional**

1  
2  
3  
4 For all successful lifestyle changes that had lasted for more than three months, the patient  
5 could refer to a person whom they trusted and who supported them in their efforts to lose  
6 weight. They all had a good and trustworthy relationship to their GPs. Six found support in the  
7 dietician involved in the study, one found support in the GP nurse, one found support in an  
8 online coach, one in a spiritual leader, and one had not been successful. The four (three men  
9 and one woman) who had not found support in the dietician in the intervention were the least  
10 successful in the study.  
11

12  
13 "I think it was really nice to see CA (the dietician), also because she could see it  
14 was my head that controlled me a lot"  
15

16  
17 "I don't know if I would always use it (the intervention tool facility to report diet  
18 intake) because sometimes I would just not report anything... avoiding being  
19 confronted with the fact that I had eaten more than I should"  
20

21 Some of the patients revealed that they did not trust the dietician who had been assigned to  
22 them or the IT system, and they stated the lack of trust as the main reason for them to  
23 discontinue the intervention or to find another guidance.  
24

25  
26 "I can't have a settled plan... well, it is more when I told it to her then I said: "it  
27 does not work for me. I can't use it in that way", and then I actually did not come  
28 back..."  
29

30  
31 "I felt the trust I had showed had been misused in a way, not that I don't want to  
32 join a group and talk about a lot of things, what I have eaten etc....., but all of a  
33 sudden another dietician sent me messages and then I said: "now it stops, now it  
34 (the information) is so far out that I don't want it and feel I can control it"  
35

36 One of the participants established a contact to another online life style coach who helped him  
37 to achieve a significant weight loss without a single face-to-face meeting.  
38

### 39 **Monitoring the behavioural change with personnel feedback**

40 All patients found it positive that their health professional of choice showed interest in their  
41 self-measurements.  
42

43  
44 "One who had to see that I kept my weight. If not, I would have said I had done it  
45 without having done it..... to satisfy others".  
46

47  
48 "...and I can't cheat it (An objective activity monitoring fitness app:  
49 "Endomondo"). It is not possible for me to pretend I have gone for a walk when I  
50 haven't".  
51

### 52 **Goal setting**

53 Individual goal setting was recognized as difficult. Several patients could reveal how they had  
54 daily or weekly goals for activity, diet or weight. Most effective seemed daily goals due to the  
55 fact that action was needed within small highlighted timeslots.  
56  
57  
58  
59  
60

1  
2  
3  
4 "Today, when I have to go to work at noon, then I would go for a walk during the  
5 morning. Sometimes I walk four times a week, but it should be at least 15 km per  
6 week."  
7

### 8 **Experienced significant perceived life events igniting the right time for action**

9 All patients could reveal how a specific situation or life event had ignited their lifestyle  
10 change. Five revealed that a special incident in their family changed their way of thinking with  
11 regard to their lifestyle. Three had experienced that their doctor or another health  
12 professional had made it clear to them that they had to do something. Two had received an  
13 effective treatment that had helped them with their weight control or tiredness to a degree  
14 that made it possible to act in a different way.  
15  
16

17 "My husband got diabetes type 2, and then I also lost 10-12 kg in the spring...."

18  
19 "It was a very specific episode that ignited it (red. the lifestyle change)... I came  
20 home one night very tired.... My husband is on his way to bed, and then he says:  
21 "by the way the kids and I found a bag of candy in your handbag that we ate - I  
22 hope that is okay?" I then went completely mad and wanted a divorce... , but then  
23 during the night, I realized that I had a problem. I had three kids, and I wanted to  
24 break up my marriage due to a bag of candy....."  
25  
26  
27

### 28 **Impediments/barriers to lifestyle change**

29 The patients could reveal many reasons as to why they had difficulties keeping the weight  
30 down both from intrinsic factors within themselves and from extrinsic factors.  
31

### 32 **The perception of insurmountable obstacles**

33 Several patients described how they used illnesses or other deficits to explain their lack of  
34 ability to do something about their health.  
35  
36

37 ""Yes, if someone says: "Well, wouldn't you like to lose weight?", then I say: "Yes,  
38 but it is very hard because .... (red. I'm using antidepressants), and then the same  
39 story goes on. So it is an excuse for not losing weight"  
40

41 "I had this knot under my left foot removed in surgery two years ago. Three  
42 months ago, I had the same operation in the other foot. So I'm not able to do it  
43 (exercise), and I still can't use regular foot wear. I still use sandals".  
44  
45

### 46 **Experience of lack of self-efficacy**

47 Several patients explained how they often felt tempted, and that their confidence in being able  
48 to avoid inappropriate behaviour was low.  
49

50 "It is probably because I can eat a little candy again or buy a chocolate bar when  
51 I'm out shopping.... And I have problems saying no thanks".  
52  
53

### 54 **Excess eating of high calorie foods**

55 Many of the patients had experiences with the weight going up and down. When they allowed  
56 themselves to eat even small amounts of sweets, their weight went up very quickly.  
57  
58  
59  
60



1  
2  
3  
4 "It happened very fast. I think it was in December ... I allowed myself to eat a  
5 cookie... by the end of January, I had gained 10 kg.  
6 "Just like an alcoholic can't drink half a bottle of wine, then I will never be able to  
7 eat 100g of chocolate without having to really holding myself back"  
8  
9

### 10 **Role of family and friends**

11 As severe overweight persons it is obvious to everyone they meet that they have challenges in  
12 relation to their lifestyle. The support from close family and friends was found important, and  
13 intrinsic factors that inhibit weight loss can be potentiated or challenged in contact with  
14 others.  
15

### 16 **The experience of an honest and trustworthy person-to-person forum to discuss 17 personal challenges**

18 Most patients found support from friends they had met in their struggle to lose weight. Both  
19 relations established in traditional meetings and online forums were described as important.  
20  
21

22 "Then I have my friend, whom I met when I joined Weight Watchers. She has all  
23 these ideas as to how to combine different food ingredients..... and my other  
24 friend has that as well, but she has now joined this online group low fat, high  
25 something.....".  
26  
27

28 "...I'm more in need of a closed group for people who have the same problems as  
29 I have or at least are in the same position as I am" and "I could do it (be honest) if  
30 it was online, but not if I had to look them in the eyes."  
31  
32

33 Several of the patients used Facebook or apps, where they communicated with friends and  
34 family. Several of the patients described how they experienced that they were able to  
35 communicate more honestly with their online friends.  
36

37 Online: "If it is someone I would never meet, then I could be honest, but as soon I  
38 know that it is someone I am going to meet, then I add to the story".  
39  
40

### 41 **The need for acknowledgement from referent others**

42 To sustain a lifestyle change most of the patients said that the most important person was  
43 their partner or another person close to them who continued to regard the lifestyle change as  
44 important. For most of the patients, the dietician or another health professional had been the  
45 most important person. After the study, a number of the patients returned to their old habits,  
46 and the lack of support was missed.  
47

48 "The worst thing was that nobody called me up" and said: "Why is it you have not  
49 scheduled a new appointment?"  
50  
51

52 In the online setting, acknowledgement also made a difference to a majority of the patients  
53 using the online media.  
54

55 "I used it (red. the forum in the intervention) a lot. ...the fact that I could be  
56 honest and put my cards on the table, because they all knew how it is to have the  
57  
58  
59  
60

1  
2  
3  
4 urge to drive to the next baker and empty the store on the way home. So it was  
5 actually very important to me that I had that forum.”  
6

7  
8 “...It is the same with Endomondo. I have friends there. And then I have to show I  
9 walk. Not to make them believe I’m not active”  
10

### 11 **Support from spouse/partner and family**

12 All patients shared their goals and achievements with their spouse/partner and family. Most  
13 found their spouse/partner supportive, but a minority could also reveal how they were taking  
14 a judgmental position with regard to their lifestyle choices.  
15

16  
17 “..when we first got started, he went all in and started to cook the way I wanted,  
18 and he also lost weight and started running.”  
19

20  
21 “This thing with saying: “hey we have to remember vegetables”” ...”He may also  
22 say: “Do you really have to eat that?” He is very observant to what I eat. A little  
23 judgmental if I eat something that is not healthy”  
24

## 25 **DISCUSSION**

26  
27  
28 To our knowledge, this is the first qualitative interview study among the users of a successful  
29 long-term lifestyle change e-health platform showing what elements are important for the  
30 patient to achieve success. Establishing a trustworthy relationship with a lifestyle coach was  
31 the most important factor for a long-term successful lifestyle change. This matches the social  
32 ecological point of view that establishing a good relationship to the patient is of paramount  
33 importance for coaching patients to make difficult decisions (Bandura, 2004; Zoffmann,  
34 Harder, & Kirkevold, 2008). To establish a trustworthy relationship with your health  
35 professional can be difficult in a 100% online solution. The provided solution delivered a  
36 combination that seemed to strengthen the relationship to the lifestyle coach even though  
37 some patients were able to find a strong and consistent support by themselves outside the GP  
38 setting or in alternative settings. Goal setting and monitoring the behavioural change are  
39 important for many patients, but it needs to be delivered empathically and only when  
40 relevant. Goal-directed action is the basis of the social action theory (Ewart, 2009) and, by  
41 using e-health solutions, this can be done real time both objectively  
42 (Endomondo/accelerometers in smartphones through Google fit or Apple health kit) and  
43 subjectively through reporting. Igniting a lifestyle change was often encouraged by a specific  
44 event. This event could be intrinsic from a significant perceived life event in close family or  
45 extrinsic from a health professional who through an eye opening talk or an effective treatment  
46 helped the patient to decide that weight loss or other lifestyle changes were important  
47 enough to do something about. Barriers centred around perceived insurmountable obstacles,  
48 lack of self-efficacy, and excess eating of high calorie foods, which very much related to the  
49 intrapersonal stream described in the Theory of Triadic Influence (TTI) (Flay et al., 2009). To  
50 close the gap patients could describe how the supportive role they experienced both offline  
51 and online from referent others made a huge difference. This interpersonal aspect is the  
52 second stream in TTI and confirms that meeting others in the same situation is important. The  
53 third stream in TTI is the sociocultural environment that changes to some extent when a  
54  
55  
56  
57  
58  
59  
60

1  
2  
3  
4 person meets up online with new people who also want to lose weight. Basically, you can  
5 change your referent others ("friends") online, something that might be of paramount  
6 importance in the future, especially for people from lower social classes, with little support  
7 from home, or who live alone (Winzelberg et al., 2003). Many of the same psychological  
8 support elements are found in anonymous forums like Anonymous Alcoholics. Lastly,  
9 spouse/partner and family play an important role for our participants. The participants all  
10 reported support from their spouse/partner and family during their weight loss, which is in  
11 accordance with the social cognitive theory underlying the importance of the opinion of  
12 referent others (Bandura, 2004).

13  
14 The present findings will be included in the future development of e-health solutions and  
15 tested in studies based on these new e-health solutions. (C. J. Brandt et al., 2014).  
16

## 17 18 **CONCLUSION**

19 A strong relationship with a health professional or another person with coaching ability is  
20 essential for long-term successful weight loss. E-health could support the relationship and  
21 provide behavioural change through monitoring and empathic relevant feedback. The opinion  
22 of friends and family matters, and long-term success with lifestyle change depends on the  
23 ability to establish a strong positive support on a day-to-day basis, which can be supported by  
24 e-health solutions. The patient needs to feel that the health professional cares for her/him if  
25 she/he is going to experience a long-term successful lifestyle change.  
26  
27

### 28 29 Contributor statement:

30 CJB, JC, JBN and JS have all contributed substantially to the conception and the design of the  
31 work, analysis and interpretation of data.

32 CJB, JC, JBN and JS have all been involved in drafting and revising the article critically for  
33 important intellectual content.

34 CJB, JC, JBN and JS have all approved the final version attached, will approve the final  
35 published version and agree to be accountable for all aspects of the work in ensuring that  
36 questions related to the accuracy or integrity of any part of the work are appropriately  
37 investigated and resolved.  
38  
39

### 40 41 Competing interest:

42 Carl J. Brandt owns stocks in LIVA Healthcare ApS, the company that has developed parts of  
43 the technical platform used by the patients in the pilot study.  
44

### 45 46 Funding:

47 The study has been partly funded by The Region of Southern Denmark, KEU project 07/10.  
48

### 49 50 Data sharing statement:

51 All 10 interviews can be provided in Danish upon request.  
52  
53

## 54 55 **REFERENCES**

56 [1] [www.SlankeDoktor.dk](http://www.SlankeDoktor.dk)  
57  
58  
59  
60

- 1  
2  
3  
4 Afshin, A., Babalola, D., Mclean, M., Yu, Z., Ma, W., Chen, C. Y., . . . Mozaffarian, D. (2016).  
5 Information technology and lifestyle: a systematic evaluation of internet and mobile  
6 interventions for improving diet, physical activity, obesity, tobacco, and alcohol use.  
7 *Journal of the American Heart Association*, 5(9), e003058.
- 8 Appel, L. J., Clark, J. M., Yeh, H.-C., Wang, N.-Y., Coughlin, J. W., Daumit, G., . . . Geller, S. (2011).  
9 Comparative effectiveness of weight-loss interventions in clinical practice. *New*  
10 *England Journal of Medicine*, 365(21), 1959-1968.
- 11 Bandura, A. (2004). Health promotion by social cognitive means. *Health education & behavior*,  
12 31(2), 143-164.
- 13 Brandt, C. J., Brandt, V., Pedersen, M., Glintborg, D., Toubro, S., Nielsen, J. B., . . . Søndergaard, J.  
14 (2014). Long-term effect of interactive online dietician weight loss advice in general  
15 practice (LIVA) protocol for a randomized controlled trial. *International journal of*  
16 *family medicine*, 2014.
- 17 Brandt, V., Brandt, C. J., Glintborg, D., Arendal, C., Toubro, S., & Brandt, K. (2011). Sustained  
18 weight loss during 20 months using a personalized interactive internet based dietician  
19 advice program in a general practice setting. *International Journal on Advances in Life*  
20 *Sciences Volume 3, Number 1 & 2, 2011*.
- 21 Ewart, C. K. (2009). Changing our unhealthy ways: Emerging perspectives from social action  
22 theory. *Emerging theories in health promotion practice and research*, 2, 359-389.
- 23 Flay, B., Snyder, F., Petraitis, J., DiClemente, R., Kegler, M., & Crosby, R. (2009). Emerging  
24 theories in health promotion practice and research: Jossey-Bass San Francisco, CA.
- 25 Hartmann - Boyce, J., Johns, D., Jebb, S., & Aveyard, P. (2014). Effect of behavioural techniques  
26 and delivery mode on effectiveness of weight management: systematic review, meta -  
27 analysis and meta - regression. *Obesity Reviews*, 15(7), 598-609.
- 28 Levine, D. M., Savarimuthu, S., Squires, A., Nicholson, J., & Jay, M. (2015). Technology-assisted  
29 weight loss interventions in primary care: a systematic review. *Journal of general*  
30 *internal medicine*, 30(1), 107-117.
- 31 Lupton, D. (2013). The digitally engaged patient: Self-monitoring and self-care in the digital  
32 health era. *Social Theory & Health*, 11(3), 256-270.
- 33 Sherrington, A., Newham, J., Bell, R., Adamson, A., McColl, E., & Araujo - Soares, V. (2016).  
34 Systematic review and meta - analysis of internet - delivered interventions providing  
35 personalized feedback for weight loss in overweight and obese adults. *Obesity Reviews*.
- 36 Storni, C. (2015). A Manifesto for Epistemological Empowerment in Chronic Disease Self Care  
37 *Empowering Users through Design* (pp. 267-279): Springer.
- 38 Winzelberg, A. J., Classen, C., Alpers, G. W., Roberts, H., Koopman, C., Adams, R. E., . . . Taylor, C.  
39 B. (2003). Evaluation of an internet support group for women with primary breast  
40 cancer. *Cancer*, 97(5), 1164-1173.
- 41 Zoffmann, V., Harder, I., & Kirkevold, M. (2008). A person-centered communication and  
42 reflection model: sharing decision-making in chronic care. *Qualitative health research*,  
43 18(5), 670-685.
- 44  
45  
46  
47  
48  
49  
50  
51  
52  
53  
54  
55  
56  
57  
58  
59  
60

# BMJ Open

## Drivers for successful long-term lifestyle change, the role of e-health: a qualitative interview study

|                                 |                                                                                                                                                                                                                                                                                                                                                                                                                                                                                                                                                                                                                                                                                                                                                 |
|---------------------------------|-------------------------------------------------------------------------------------------------------------------------------------------------------------------------------------------------------------------------------------------------------------------------------------------------------------------------------------------------------------------------------------------------------------------------------------------------------------------------------------------------------------------------------------------------------------------------------------------------------------------------------------------------------------------------------------------------------------------------------------------------|
| Journal:                        | <i>BMJ Open</i>                                                                                                                                                                                                                                                                                                                                                                                                                                                                                                                                                                                                                                                                                                                                 |
| Manuscript ID                   | bmjopen-2017-017466.R1                                                                                                                                                                                                                                                                                                                                                                                                                                                                                                                                                                                                                                                                                                                          |
| Article Type:                   | Research                                                                                                                                                                                                                                                                                                                                                                                                                                                                                                                                                                                                                                                                                                                                        |
| Date Submitted by the Author:   | 20-Dec-2017                                                                                                                                                                                                                                                                                                                                                                                                                                                                                                                                                                                                                                                                                                                                     |
| Complete List of Authors:       | Brandt, Carl; Syddansk Universitet Det Sundhedsvidenskabelige Fakultet, Research unit for General practice, Department for public health; Syddansk Universitet Det Sundhedsvidenskabelige Fakultet, CIMT - Centre for Innovative Medical Technology<br>Clemensen, Jane; Odense Universitetshospital, Hans Christian Andersen's Childrens Hospital ; Syddansk Universitet Det Sundhedsvidenskabelige Fakultet, CIMT - Centre for Innovative Medical Technology<br>Nielsen, Jesper; Syddansk Universitet Det Sundhedsvidenskabelige Fakultet, Research Unit of General Practice, Dept. of Public Health<br>Søndergaard, Jens; Syddansk Universitet Det Sundhedsvidenskabelige Fakultet, Research Unit of General Practice, Dept. of Public Health |
| <b>Primary Subject Heading</b>: | General practice / Family practice                                                                                                                                                                                                                                                                                                                                                                                                                                                                                                                                                                                                                                                                                                              |
| Secondary Subject Heading:      | Patient-centred medicine, Qualitative research, Diabetes and endocrinology, Communication                                                                                                                                                                                                                                                                                                                                                                                                                                                                                                                                                                                                                                                       |
| Keywords:                       | behavioral outcome, weight loss, behavioral change support system, Telemedicine < BIOTECHNOLOGY & BIOINFORMATICS, lifestyle change, obesity                                                                                                                                                                                                                                                                                                                                                                                                                                                                                                                                                                                                     |
|                                 |                                                                                                                                                                                                                                                                                                                                                                                                                                                                                                                                                                                                                                                                                                                                                 |

SCHOLARONE™  
Manuscripts

1  
2  
3  
4  
5 **Drivers for successful long-term lifestyle change, the role of e-health:**  
6 **a qualitative interview study**  
7  
8  
9

10  
11 **Corresponding author: Carl J. Brandt, MD, GP**  
12 **Research Unit of General Practice, Dept. of Public Health**  
13 **University of Southern Denmark**  
14 **Odense, Denmark**  
15 **e-mail: cbrandt@health.sdu.dk**  
16

17  
18 Jane Clemensen RN, Professor, PhD  
19 Hans Christian Andersen's Childrens Hospital and  
20 CIMT - Centre for Innovative Medical Technology  
21 University of Southern Denmark and Odense University Hospital  
22 Odense, Denmark  
23 e-mail: Jane.Clemensen@rsyd.dk  
24

25  
26 Jesper Bo Nielsen, Professor PhD  
27 Research Unit of General Practice, Dept. of Public Health  
28 University of Southern Denmark  
29 Odense, Denmark  
30 e-mail: jbn Nielsen@health.sdu.dk  
31

32 Jens Søndergaard, MD, Professor, PhD  
33 Research Unit of General Practice, Dept. of Public Health  
34 University of Southern Denmark  
35 Odense, Denmark  
36 e-mail: jsoendergaard@health.sdu.dk  
37

38  
39 **ABSTRACT**

40 **Objectives:** Assisting patients in lifestyle change using collaborative e-health tools can be an  
41 efficient treatment for noncommunicable diseases like diabetes, cardiovascular disease and  
42 COPD that are caused or aggravated by unhealthy living in the form of unhealthy diet, physical  
43 inactivity or tobacco smoking. In a prospective pilot study we tested an online collaborative e-  
44 health tool in General Practice. The aim of the study was to identify drivers of importance for  
45 long-term personal lifestyle changes from a patient perspective when using a collaborative e-  
46 health tool, including the support of peers and healthcare professionals.  
47

48 **Setting:** General practice clinics in the Region of Southern Denmark.

49 **Participants:** Ten overweight patients who had previously successfully used a hybrid online  
50 collaborative e-health tool with both face-to-face and online consultations to lose weight.

51 **Results:** The main themes identified were facilitators, barriers and support from family and  
52 peers. Establishment of a trustworthy relationship with the healthcare professionals were of  
53 paramount importance. It was important for the patients to monitor the measurable  
54 outcomes with realistic goals and feedback from a trusted person. Often, significant life events  
55 were identified as catalysts for successful long-term lifestyle changes. Dominant barriers to  
56 change were perception of insurmountable obstacles, experience of lack of self-efficacy and  
57  
58

1  
2  
3  
4 excess eating of high calorie food. Finally experiencing of trustworthy person-to-person  
5 forums, need for acknowledgement from referent others and support from family and peers  
6 were important drivers for long-term lifestyle change.

7 **Conclusion:** The most important driver in long-term weight loss was a strong relationship  
8 with a healthcare professional. Collaborative e-health tools can support the relationship and  
9 behavioural changes through monitoring and relevant feedback. The support from family and  
10 peers also matters, and long-term success depends on the ability to establish strong, positive  
11 support on a day-to-day basis.  
12

## 13 **Strengths and limitations of this study**

- 14 • This study identified drivers for successful long-term lifestyle change among patients having  
15 used a collaborative online e-health tool in general practice.
- 16 • This study mainly included patients with successful long-term lifestyle change, therefore  
17 reasons for lack of engagement and non-adherence might have been overseen.
- 18 • Authors CJB and JS both are General Practitioners, which might have influenced their  
19 prejudices however, all authors took this in to consideration when analysing the data.  
20  
21  
22

## 23 **BACKGROUND**

24 Many noncommunicable diseases such as diabetes, cardiovascular diseases, cancer and COPD  
25 are caused or aggravated by common preventable risk factors, e.g. tobacco use, unhealthy  
26 diet, and physical inactivity. Although being overweight and having an unhealthy lifestyle can  
27 be uncomfortable, changing lifestyle is extremely difficult. For weight loss to have a positive  
28 impact on health, it needs to be sustainable and especially long-term lifestyle changes  
29 (defined as more than 12 to 18 months) have proven difficult.<sup>1</sup> One of the major challenges for  
30 lifestyle change seems to be that social relationships that are often challenged by peers, who  
31 do not understand the importance of the lifestyle change to the person.<sup>2</sup> This might be one of  
32 the reasons why patients find it difficult to acknowledge the complexities and ambivalences  
33 that are part of using collaborating e-health tools.<sup>3</sup>  
34  
35

36 Even though recent systematic reviews have concluded that Internet and mobile  
37 interventions can improve lifestyle behaviours, most studies had no more than three to six  
38 months' follow up, which emphasizes the need for research in long-term interventions.<sup>4, 5, 6</sup>  
39 Most e-health tools and electronic lifestyle monitors use behavioural change techniques such  
40 as self-monitoring, goal setting and social support.<sup>7</sup> In systematic reviews, adding personal  
41 feedback seems to improve outcome in comparison to automated response feedback.<sup>8</sup>  
42  
43

44 Several key theories of change from the field of behavioural science are employed in many  
45 lifestyle change and e-health tools, and have been used in this study as well. In accordance  
46 with social cognitive theory (SCT), a number of constructs come into play when patients try to  
47 change lifestyle. SCT has five constructs: (1) measurable outcome i.e. steps, (2) proximal goal  
48 setting i.e. daily breakfast, (3) procedural knowledge instead of content knowledge i.e. to walk  
49 10000 steps daily instead of "live healthy", (4) perceived self-efficacy through experiences of  
50 reaching planned goals, and (5) social structural factors i.e. the influence of experiencing  
51 support (or obstruction) for a healthier lifestyle from family or peers.<sup>9</sup> The Social Action  
52 Theory (SAT) takes it one step further and explains how goal-directed action can lead to  
53 cognitive change that ultimately restructures the environmental context, including social  
54 relations, for long-term lifestyle change.<sup>10</sup> Finally, the theory of triadic influence (TTI) outlines  
55 that to be successful, three streams of information need to be recognised: the intrapersonal  
56  
57  
58  
59

stream, the interpersonal stream and the social environmental stream, indicating the complexity of helping a patient change from an unhealthy lifestyle to a healthy lifestyle.<sup>11</sup>

We therefore anticipate that the outcome expectations and goal setting need to be developed in collaboration between a health coaching professional and the patient in order to have a longer-lasting effect for the patient. The Internet and the rise of social media have changed our social patterns, and it has become possible to build relationships via digital tools. Some studies suggest that certain groups of patients might also benefit from this<sup>12</sup>.

In a previous study, we found that a collaborative online e-health tool could support a significant weight loss of 7,0 kg during a 20 month period in a general practice setting. The collaborative e-health tool was used in a hybrid manner beginning with a personal meeting and included various behavioural change techniques such as joint goal setting, tailored information, self-monitoring, lifestyle coaching, in-person feedback, reminders, and person-to-person support.<sup>13</sup> A second version of the same collaborative e-health tool showed similar results for men with diabetes, who had an average 5,4 kg weight loss during a 12 month period (compared to 2,8 kg for a control group) in a municipal setting. Semi-structured interviews with patients in the later study suggested that the initial face-to-face meeting was important for building a trustworthy relationship.<sup>14</sup> But overall, the important drivers for such a lifestyle change and what role the collaborative e-health tool played has not previously been addressed.

Hence we aimed to identify drivers of importance for weight loss management for patients who had used a hybrid collaborative online e-health tool for weight loss taking into account the patient's perspectives having experienced a collaborative e-health model.

## **METHODS**

### **Design**

To create new knowledge about the essential themes for this group of patients we used qualitative, semi-structured, individual interviews to explore the field without distraction.

### **Context**

Ten overweight patients from a rural area in the Region of Southern Denmark were recruited for the study. They had all participated in the previous study that utilised a hybrid collaborative online e-health tool also involving face-to-face meetings.

### **Sampling**

Purposive sampling was conducted among patients who had participated in the prior study with regard to gender, age and weight loss. Three men and seven women, ages 34 to 71, average age 52, with an average weight of 109 kg and a median weight loss of 10.5 kg (from 2 to 16 kg) during the 20-month study period were invited. Six had been consistently interacting with the designated healthcare professional during the study, two stopped responding to information given, one left the study early and one never started. Invitations for this qualitative study were by phone and none declined the invitation.

### **The intervention**

The collaborative online e-health tool was used as a supplemental tool for a dietician working in general practice, making sure that the relationship was established in-person before



beginning online communication. The same dietician met the patient in the clinic and handled the online lifestyle coaching with the patient. Apart from the dietician, the patients could meet and share health data/information with other patients in the online forums established through the collaborative e-health tool (Appendix 1). This developed into a strong community where it was also possible for patients to discuss many personal issues<sup>13</sup>.

### Interview Procedure

The interviews presented in this study took place 5 years after the end of the initial intervention. All patients were interviewed for 45 minutes to 1 hour and a relaxed atmosphere was achieved by holding the interviews one to one in the patients' homes, except for two who preferred to be interviewed in the medical centre. All interviews were carried out by CJB, who has worked as a GP for more than ten years and with different e-health tools for more than 15 years, including the e-health tool used in the intervention. Before every interview, CJB briefly explained the purpose and nature of the research, answered questions, and provided participants with a description of the study in layman's terms. CJB explained to the patients that the interview data would be anonymized, and an informed consent document was signed by both the patient and CJB. The ethics committee for the Region of Southern Denmark reviewed the protocol and found that the Medical Research Involving Human Subjects Act does not apply to this study. A formal approval was therefore not required for this study. We did obtain written consent nevertheless, due to the sensitivity of the subject matter.

Table 1. Interview guide

| Themes                                                      | Probing questions                                                                                                                                                                              |
|-------------------------------------------------------------|------------------------------------------------------------------------------------------------------------------------------------------------------------------------------------------------|
| Disease history                                             | Do you have any diseases? What does that mean to you? What does it mean for your wellbeing? How do you see your health in general?                                                             |
| Experience with taking action to change lifestyle           | Have you ever taken the initiative to improve or change your lifestyle? How did it go?                                                                                                         |
| Experience with support from health professionals and peers | Who has helped you with your health challenges? Who has been the best to help you? How? What was the worst experience? How?                                                                    |
| Experience with and thoughts about e-health tools           | Do you have a smartphone? Have you ever used apps or the Internet in relation to your health or wellbeing? Have you found recipes on the internet? Have you used apps in relation to exercise? |

The semi-structured interviews followed an interview guide, which resulted in an iterative approach, for emerging themes and perspectives to be explored<sup>15</sup>. The semi-structured interviews were segmented into four fields of interest: 1) Patient disease history, 2) Patient experiences with taking action to change lifestyle, 3) Patient experiences with support from health professionals and peers, and 4) Patient experiences with and thoughts about e-health tools. See Table 1.

1  
2  
3  
4 The interview guide was tested among family and colleagues prior to use. All interviews were  
5 audiotaped. Field notes were made during and immediately after the interviews.  
6

### 7 **Analysis**

8 Interviews were transcribed and uploaded to a common database verbatim. Transcripts were  
9 analysed by the researchers (CJB, JC, JBN and JS) using thematic analysis. An explorative  
10 approach was applied for systematic text condensation.<sup>16 17</sup> The process began with reading  
11 the transcripts. After the initial 4 interviews, the authors conducted an overview of the  
12 transcripts and identified themes of importance. The authors then agreed on codes across  
13 ideas and themes that could be categorized. CJB then coded all transcripts in accordance with  
14 the agreed codes. The coded transcripts were shared and discussed. Data from each theme  
15 were condensed and summarized into concepts and generalized descriptions. Several times  
16 throughout the process, identified themes were compared between the different researchers.  
17 Overlap was identified and consistency was reached. Coinciding themes of importance were  
18 then put into a common framework. Data collection was terminated due to saturation when  
19 no new themes emerged. The quotes that best illustrated the different themes and subthemes  
20 were selected and translated from Danish to English by CJB. All quotes were then evaluated by  
21 the remaining authors and changes were made to reach agreement among all authors.  
22  
23  
24  
25

## 26 **RESULTS**

27 All but one of the participants used smartphones or tablets. One only used a traditional cell  
28 phone and had his wife entering data via a computer. They all used apps and the Internet, but  
29 no longer had access to the intervention tool [www.slankedoktor.dk](http://www.slankedoktor.dk) described in accordance  
30 with (TIDieR) checklist<sup>18</sup> and the cCALO-RE: Coventry, Aberdeen and London-Refined  
31 taxonomy<sup>19</sup> in Appendix 1. Five years after the initial intervention, they all still used the  
32 Internet or apps for benefitting their health. Everyone looked up recipes, some had joined  
33 weight-loss Facebook groups, and some used an app-based service monitoring their physical  
34 activity. They were not aware of all the functionality that could support them for free using  
35 their smartphones, but the majority acknowledged that the provided collaborative e-health  
36 tool had helped them during the intervention period. Following the two years' intervention  
37 study five years ago, some had gained weight, but not to the level before the intervention. We  
38 identified three main themes: facilitators, barriers, and the support of family and peers (see  
39 Table 2).  
40  
41  
42  
43

### 44 **Facilitators for lifestyle change**

45 A number of subthemes were identified to facilitate long-term lifestyle change, but over all  
46 establishing an honest relationship with a healthcare professional, who were trusted to  
47 monitor the patient and able to set realistic goals with the patient were most important  
48

### 49 **The establishment of an honest and trustworthy relationship with the health** 50 **professional**

For all successful lifestyle changes that had lasted for more than three months, the patient could refer to a person whom they trusted and who supported them in their efforts to lose weight. They all had a good and trustworthy relationship with their GPs. Six found support from the dietician involved in the study (including online support), one found support from the GP nurse, one found support from an online coach, one from a spiritual leader, and one

Table 2. Summary of main themes

| Facilitators                                                                             | Barriers                                   | Support from family and peers                                |
|------------------------------------------------------------------------------------------|--------------------------------------------|--------------------------------------------------------------|
| The establishment of an honest and trustworthy relationship with the health professional | The perception of insurmountable obstacles | Experience of honest and trustworthy person-to-person forums |
| Monitoring the behavioural change with personal feedback                                 | Experience of lack of self-efficacy        | Need for acknowledgement from referent others                |
| Goal setting                                                                             | Excess eating of high calorie food         | Support from family and peers                                |
| Experiencing significant life events igniting the right time for action                  |                                            |                                                              |

had not been successful. The four (three men and one woman) who had not found support in the dietician in the intervention were the least successful in the pilot study.<sup>13</sup>

I think it was really nice to see CA (the dietician), also because she could see it was my head that controlled me a lot. (P2, female)

Some of the patients said that they did not trust the dietician who had been assigned to them nor did they trust the e-health tool, and they identified the lack of trust as the main reason for discontinuing the intervention or seeking other guidance.

I can't have a settled plan... well, it is more when I told it to her then I said: "it does not work for me. I can't use it in that way", and then I actually did not come back.... (P5, male)

I felt the trust I had showed had been misused in a way, not that I don't want to join a group and talk about a lot of things, what I have eaten etc....., but all of a sudden another dietician sent me messages and then I said: "now it stops, now it (the information) is off track, that I don't want it and feel I can't control it. (P9, male)

One of the participants established contact with another online lifestyle coach who helped him to achieve a significant weight loss without a single face-to-face meeting, which means

1  
2  
3  
4 that seven out of ten had used online support for their weight loss and three had found face-  
5 to-face support from alternative sources that were better for them.  
6

### 7 **Monitoring the behavioural change with personal feedback**

8 All patients found it positive that their health professional of choice showed interest in their  
9 self-measurements.  
10

11 One who had to see that I kept my weight. If not, I would have said I had done it  
12 without having done it..... to satisfy others.....  
13 ...and I can't cheat it (An objective activity monitoring fitness app:  
14 "Endomondo"). It is not possible for me to pretend I have gone for a walk when I  
15 haven't. (P1, female)  
16  
17

### 18 **Goal setting**

19 Individual goal setting was recognized as difficult. Several patients revealed that they had  
20 daily or weekly goals for activity, diet or weight. Daily goals seemed most effective due to the  
21 fact that action was needed within small, discrete windows of time.  
22

23 Today.. I just have to walk my 10.000 steps, and swim two times a week. And  
24 then I eat what I always have eaten except I don't eat that stof (candy), because  
25 I'm not tired, so I don't need it. (P8, female)  
26 Then I stopped eating candy, and I have neither bought or had candy for three  
27 months and I have lost 7 kg. (P3, female)  
28  
29

### 30 **Experienced life events perceived as significant, igniting the right time for action**

31 All patients revealed how a specific situation or life event had ignited their lifestyle change.  
32 Five revealed that a specific incident in their family changed their way of thinking with regard  
33 to their lifestyle. Three had experienced that their doctor or another health professional had  
34 made it clear to them that they had to do something. Two had received an effective treatment  
35 that had helped them with their weight control or tiredness to a degree that made it possible  
36 to act in a different way.  
37  
38

39 ....It was a very specific episode that ignited it (the lifestyle change)... I came  
40 home one night very tired.... My husband is on his way to bed, and then he says:  
41 "by the way the kids and I found a bag of candy in your handbag that we ate - I  
42 hope that is okay?" I then went completely mad and wanted a divorce... , but then  
43 during the night, I realized that I had a problem. I had three kids, and I wanted to  
44 break up my marriage due to a bag of candy..... (P10, female)  
45  
46

### 47 **Barriers to lifestyle change**

48 The patients gave many reasons as to why they had difficulties keeping the weight off, both in  
49 their own perception of insurmountable obstacles, experience of lack of self-efficacy and in  
50 having difficulties with excess eating of high calorie foods, which is explained in more detail  
51 below.  
52

### 53 **The perception of insurmountable obstacles**

54 Several patients described how they used illnesses or other deficits to explain their lack of  
55 ability to do something about their health.  
56  
57  
58  
59  
60

1  
2  
3  
4 I had this knot under my left foot removed in surgery two years ago. Three  
5 months ago, I had the same operation in the other foot. So I'm not able to do it  
6 (exercise), and I still can't use regular footwear. I still use sandals. (P1, female)  
7

### 8 **Experience of lack of self-efficacy**

9 Several patients explained how they often felt tempted to indulge in high-calorie foods, and  
10 that their confidence in being able to avoid inappropriate behaviour was low.  
11

12 It is probably because I can eat a little candy again or buy a chocolate bar when  
13 I'm out shopping.... And I have problems saying no thanks. (P2, female)  
14  
15

### 16 **Excess eating of high calorie foods**

17 Many of the patients had experiences with their weight going up and down. When they  
18 allowed themselves to eat even small amounts of sweets, their weight went up very quickly.  
19

20 "It happened very fast. I think it was in December ... I allowed myself to eat a  
21 cookie... by the end of January, I had gained 10 kg.....Just like an alcoholic can't  
22 drink half a bottle of wine, then I will never be able to eat 100g of chocolate  
23 without having to really hold myself back. (P10, female)  
24  
25

### 26 **Support from family and peers**

27 As severely overweight people, it is obvious to everyone they meet that they have challenges  
28 in relation to their lifestyle. The support from close family and friends was found important,  
29 and intrinsic factors that inhibit weight loss can be potentiated or challenged when the person  
30 came into contact with other supportive individuals.  
31

### 32 **The experience of honest and trustworthy person-to-person forums**

33 Most patients found support from friends they had met in their struggle to lose weight. Both  
34 relations established in traditional meetings and online forums were described as important.  
35  
36

37 "Then I have my friend, whom I met when I joined Weight Watchers. She has all  
38 these ideas as to how to combine different food ingredients..... and my other  
39 friend has that as well, but she has now joined this online group low fat, high  
40 something....." (P6, female)  
41  
42

43 Several of the patients used Facebook or apps, where they communicated with friends and  
44 family. Several of the patients described how they experienced that they were able to  
45 communicate more honestly with their online friends.  
46  
47

48 ...I'm more in need of a closed group for people who have the same problems as I  
49 have or at least are in the same position as I am" and "I could do it (be honest) if  
50 it was online, but not if I had to look them in the eyes."  
51

52 "If it is someone I would never meet, then I could be honest, but as soon I know  
53 that it is someone I am going to meet, then I add to the story. (P2, female)  
54

### 55 **Need for acknowledgement from referent others**

56 To sustain a lifestyle change, most of the patients said that the most important person was  
57 their partner/spouse or another person close to them who continued to regard the lifestyle  
58

1  
2  
3  
4 change as important. For most of the patients, the dietician or another healthcare professional  
5 had been the most important person. After the study, a number of the patients returned to  
6 their old habits, and the lack of support was missed.  
7

8 "The worst thing was that nobody called me up and said: "Why is it you have not  
9 scheduled a new appointment?" (P2, female)  
10

11 In the online setting, acknowledgement also made a difference to a majority of the patients.  
12

13 I used it (the forum in the intervention) a lot. ...The fact that I could be honest  
14 and put my cards on the table, because they all knew how it is to have the urge to  
15 drive to the next baker and empty the store on the way home. So it was actually  
16 very important to me that I had that forum. (P10, female)  
17  
18

19 "...It is the same with Endomondo. I have friends there. And then I have to show I  
20 walk. Not to make them believe I'm not active. (P7, female)  
21  
22

### 23 **Support from family and peers**

24 All patients shared their goals and achievements with their family. Most found their family  
25 supportive, but a minority also revealed that the partner/spouse took a judgmental position  
26 with regard to their lifestyle choices and some tried to support their partner/spouse through  
27 loving teasing.  
28  
29

30 ..Before I lost weight my breathing was really bad ... and I couldn't sleep at night  
31 so I would fall asleep during the day... then I would be reviled by N (partner):  
32 "Now you are sitting falling asleep again" I could in a chair and fall asleep. (P4,  
33 male)  
34  
35  
36  
37

## 38 **DISCUSSION**

39  
40 We aimed to identify important drivers for long-term lifestyle change for patients using a  
41 hybrid collaborative e-health tool and found that establishing a trustworthy relationship with  
42 a healthcare professional doing lifestyle coaching was the most important factor for a long-  
43 term successful lifestyle change. This matches the social ecological point of view that  
44 establishing a good relationship with the patient is of paramount importance for coaching  
45 patients to make difficult decisions<sup>9 20 21</sup>. To establish a trustworthy relationship with a  
46 healthcare professional can be difficult in a fully online e-health tool. The provided e-health  
47 tool in this study utilised a hybrid model, both in-person and online, that seemed to  
48 strengthen the relationship with the healthcare professional even though some patients found  
49 strong and consistent support by themselves outside the GP setting or in alternative settings.  
50 The main reasons for non-adherence was lack of trust in the dietician, and lack of trust in the  
51 e-health tool, which is in line with other studies examining reasons for noncompliance with e-  
52 health tools<sup>22</sup>.  
53  
54

55 Goal setting and monitoring the behavioural change are important for many patients, but it  
56 needs to be delivered empathically and only when relevant. Goal-directed action is the basis  
57 of the social action theory<sup>10</sup> and, by using e-health tools, this can be done real-time both  
58  
59

1  
2  
3  
4 objectively (via accelerometers in smartphones, using apps such as Google Fit, Apple's built-in  
5 Health app, or Endomondo) and subjectively through reporting. Lifestyle changes were often  
6 ignited by a specific event. This event could be intrinsic, from a perceived significant life event  
7 for the individuals or their close family, or extrinsic, such as an eye-opening talk with a health  
8 professional or an effective treatment that helped the patient decide that weight loss or other  
9 lifestyle changes were important enough to make a change.

10 Barriers centred around perceived insurmountable obstacles, lack of self-efficacy, and excess  
11 eating of high calorie foods, which very much related to the intrapersonal stream described in  
12 the Theory of Triadic Influence (TTI)<sup>11</sup>. To close the gap and reach their goals despite these  
13 barriers, patients described how the support they experienced both offline and online from  
14 referent others made a huge difference. This interpersonal aspect is the second stream in TTI  
15 and confirms that meeting others in the same situation is important.

16 The third stream in TTI is the sociocultural environment that changes to some extent when a  
17 person meets new people (including online) who also want to lose weight. That is, you can  
18 change your referent others ("friends") online, something that might be of paramount  
19 importance in the future, especially for people from lower social classes, with little support  
20 from home, or who live alone<sup>12</sup>. Many of the same psychological support elements via change  
21 of reference others are found in other successful lifestyle change groups such as Alcoholics  
22 Anonymous and/or Overeaters Anonymous. Lastly, family and peers play an important role  
23 for our participants. The participants all reported support from their family as important  
24 during their weight loss, which is in accordance with the social cognitive theory underlying  
25 the importance of the opinion of referent others<sup>9</sup>.

### 26 27 28 29 **Strengths and limitations of this study**

30 This is the first qualitative research study exploring drivers for successful long-term lifestyle  
31 change using a collaborative online e-health approach in general practice. The digital  
32 revolution makes it difficult to detect general principles for successful e-health tools before  
33 they are out-dated; instead, this qualitative study explores themes of importance across  
34 various persuasive technologies and collaborative e-health platforms that could not be  
35 highlighted in a quantitative study. It is a potential weakness that we do not know if our  
36 sample was more technically savvy than the average population, which should be addressed  
37 in future studies. On the other hand the access to new technologies becomes easier all the  
38 time why we believe the principles outlined in this applies study to most patients.

39 This study mainly included patients with successful long-term lifestyle change, meaning  
40 reasons for lack of engagement and non-adherence might have been overseen.

41 The study did not look at perspectives of individuals in relation to their outcomes; with more  
42 individuals and methodological triangulation, this might have revealed the quantitative  
43 importance of the identified themes. The result of this study is probably generalizable and  
44 supports the notion that the implementation of collaborative e-health tools might have the  
45 potential to change patient lifestyles via low-cost support for healthy living. The  
46 preconception of the authors' CJB and JS, who are GPs, might have compromised the  
47 objectivity of the data in interviews and analysis, even though it was taken into account in the  
48 analysis. Future research needs to examine the perspectives of GPs and healthcare  
49 professionals who assist patients using collaborative e-health tools, in order to better  
50 understand the perspectives of all stakeholders.  
51  
52  
53  
54  
55

## 56 **CONCLUSION**

1  
2  
3  
4 A strong relationship with a healthcare professional or another person with coaching ability is  
5 essential for long-term successful weight loss when using e-health tools. The collaborative e-  
6 health tool can be viewed as a supplement to the professional empathic relationship and  
7 support behavioural change through monitoring and empathic, relevant feedback. The  
8 opinions of family and peers matter. Long-term success with lifestyle change depends on the  
9 ability to establish strong positive support on a day-to-day basis, which can be supported by  
10 e-health tools. The patient needs to feel that the healthcare professional cares for her/him if  
11 she/he is going to be successful with a long-term lifestyle change. The present findings are  
12 probably generalizable to the use of collaborative e-health tools and have formed the basis of  
13 the later development of a collaborative e-health tool using focus group interviews in a  
14 'thinking aloud' protocol where the patients and healthcare professionals interact with the  
15 app and the backend control panel,<sup>23</sup> that is going to be used in a future study.<sup>24</sup>  
16  
17  
18

19 Contributor statement:

20 CJB, JC, JBN and JS have all contributed substantially to the conception and the design of the  
21 work, analysis and interpretation of data.

22 CJB, JC, JBN and JS have all been involved in drafting and revising the article critically for  
23 important intellectual content.

24 CJB, JC, JBN and JS have all approved the final version attached, will approve the final  
25 published version and agree to be accountable for all aspects of the work in ensuring that  
26 questions related to the accuracy or integrity of any part of the work are appropriately  
27 investigated and resolved.  
28  
29

30 Competing interest:

31 Carl J. Brandt owns stock in LIVA Healthcare ApS, the company that has developed parts of the  
32 technical platform used by the patients in the pilot study.  
33  
34

35 Funding:

36 The study has been partly funded by The Region of Southern Denmark, KEU project 07/10.  
37  
38

39 Data sharing statement:

40 All 10 interviews can be provided in Danish upon request.  
41  
42

43 REFERENCES

- 44  
45 1. Hall KD, Kahan S. Maintenance of Lost Weight and Long-Term Management of Obesity. *The*  
46 *Medical clinics of North America* 2018;102(1):183-97. doi:  
47 10.1016/j.mcna.2017.08.012 [published Online First: 2017/11/21]  
48 2. Sriram U, Morgan EH, Graham ML, et al. Support and Sabotage: A Qualitative Study of Social  
49 Influences on Health Behaviors Among Rural Adults. *The Journal of rural health :*  
50 *official journal of the American Rural Health Association and the National Rural Health*  
51 *Care Association* 2017 doi: 10.1111/jrh.12232 [published Online First: 2017/01/04]  
52 3. Lupton D. The digitally engaged patient: Self-monitoring and self-care in the digital health  
53 era. *Social Theory & Health* 2013;11(3):256-70. doi: 10.1057/sth.2013.10  
54 4. Afshin A, Babalola D, Mclean M, et al. Information technology and lifestyle: a systematic  
55 evaluation of internet and mobile interventions for improving diet, physical activity,  
56  
57  
58  
59  
60



- 1  
2  
3  
4 obesity, tobacco, and alcohol use. *Journal of the American Heart Association*  
5 2016;5(9):e003058. doi: 10.1161/JAHA.115.003058
- 6 5. Hartmann - Boyce J, Johns D, Jebb S, et al. Effect of behavioural techniques and delivery  
7 mode on effectiveness of weight management: systematic review, meta - analysis and  
8 meta - regression. *obesity reviews* 2014; 15(7).  
9 <https://www.ncbi.nlm.nih.gov/pmc/articles/PMC4237119/pdf/obr0015-0598.pdf>.
- 10 6. Sherrington A, Newham J, Bell R, et al. Systematic review and meta - analysis of internet -  
11 delivered interventions providing personalized feedback for weight loss in overweight  
12 and obese adults. *Obesity Reviews* 2016
- 13 7. Lyons EJ, Lewis ZH, Mayrsohn BG, et al. Behavior change techniques implemented in  
14 electronic lifestyle activity monitors: a systematic content analysis. *Journal of medical*  
15 *Internet research* 2014;16(8) doi: 10.2196/jmir.3469
- 16 8. Levine DM, Savarimuthu S, Squires A, et al. Technology-assisted weight loss interventions in  
17 primary care: a systematic review. *Journal of general internal medicine*  
18 2015;30(1):107-17. doi: 10.1007/s11606-014-2987-6
- 19 9. Bandura A. Health promotion by social cognitive means. *Health education & behavior*  
20 2004;31(2):143-64. doi: 10.1177/1090198104263660
- 21 10. Ewart CK. Changing our unhealthy ways: Emerging perspectives from social action theory.  
22 *Emerging theories in health promotion practice and research* 2009;2:359-89.
- 23 11. Flay B, Snyder F, Petraitis J, et al. Emerging theories in health promotion practice and  
24 research: Jossey-Bass San Francisco, CA, 2009.
- 25 12. Winzelberg AJ, Classen C, Alpers GW, et al. Evaluation of an internet support group for  
26 women with primary breast cancer. *Cancer* 2003;97(5):1164-73. doi:  
27 10.1002/cncr.11174
- 28 13. Brandt V, Brandt CJ, Glintborg D, et al. Sustained weight loss during 20 months using a  
29 personalized interactive internet based dietician advice program in a general practice  
30 setting. *International Journal on Advances in Life Sciences* 2011; 3(1&2).
- 31 14. Haste A, Adamson AJ, McColl E, et al. Web-Based Weight Loss Intervention for Men With  
32 Type 2 Diabetes: Pilot Randomized Controlled Trial. *JMIR Diabetes* 2017;2(2):e14. doi:  
33 10.2196/diabetes.7430
- 34 15. Kvale S, Brinkmann S. Interviews: Learning the Craft of Qualitative Research Interviewing.  
35 3rd ed. United States of America: SAGE 2015.
- 36 16. Malterud K. Qualitative research: standards, challenges, and guidelines. *The lancet*  
37 2001;358(9280):483-88.
- 38 17. Sandelowski M. Focus on research methods-whatever happened to qualitative  
39 description? *Research in nursing and health* 2000;23(4):334-40.
- 40 18. Hoffmann TC, Glasziou PP, Boutron I, et al. Better reporting of interventions: template for  
41 intervention description and replication (TIDieR) checklist and guide. *BMJ (Clinical*  
42 *research ed)* 2014;348:g1687. doi: 10.1136/bmj.g1687 [published Online First:  
43 2014/03/13]
- 44 19. Michie S, Ashford S, Sniehotta FF, et al. A refined taxonomy of behaviour change  
45 techniques to help people change their physical activity and healthy eating behaviours:  
46 the CALO-RE taxonomy. *Psychology & health* 2011;26(11):1479-98. doi:  
47 10.1080/08870446.2010.540664
- 48 20. Zoffmann V, Harder I, Kirkevold M. A person-centered communication and reflection  
49 model: sharing decision-making in chronic care. *Qualitative health research* 2008  
50 2008-01-25; 18(5).
- 51 21. Moyers TB, Miller WR. Is low therapist empathy toxic? *Psychology of Addictive Behaviors*  
52 2013;27(3):878. doi: 10.1037/a0030274
- 53  
54  
55  
56  
57  
58  
59

- 1  
2  
3  
4 22. Lie SS, Karlsen B, Oord ER, et al. Dropout From an eHealth Intervention for Adults With  
5 Type 2 Diabetes: A Qualitative Study. *J Med Internet Res* 2017;19(5):e187. doi:  
6 10.2196/jmir.7479 [published Online First: 30.05.2017]  
7  
8 23. LIVA 2017 [Available from: [www.livahealthcare.com](http://www.livahealthcare.com) accessed 10.12. 2017.  
9  
10 24. Brandt CJ, Brandt V, Pedersen M, et al. Long-term effect of interactive online dietician  
11 weight loss advice in general practice (LIVA) protocol for a randomized controlled  
12 trial. *International journal of family medicine* 2014;2014 doi: 10.1155/2014/245347  
13  
14  
15  
16  
17  
18  
19  
20  
21  
22  
23  
24  
25  
26  
27  
28  
29  
30  
31  
32  
33  
34  
35  
36  
37  
38  
39  
40  
41  
42  
43  
44  
45  
46  
47  
48  
49  
50  
51  
52  
53  
54  
55  
56  
57  
58  
59  
60

## Appendix 1. (TiDieR) checklist<sup>a</sup> for the former Slankedoktor.dk - A web-based weight loss intervention

| TiDieR checklist item                                       | Description                                                                                                                                                                                                                                                                                                                                                                                                                                                                                                                                                                                                                                                                                                                                                                                                                                                                                                                                                                                                                                                                                                                                                                                                                                                                                                                                                                                                                                                                                                                                                                                                                                                                                                                                                                                                                                                                                                                                                                                                                                                                                                                                                                                                                                                                                                                                                                                                                                                                                                                                                                                                                                                                                                                                                                                                                                                                                                                                                                                                                                                                                                                                                                                                                                                                                                                                                                                                      |
|-------------------------------------------------------------|------------------------------------------------------------------------------------------------------------------------------------------------------------------------------------------------------------------------------------------------------------------------------------------------------------------------------------------------------------------------------------------------------------------------------------------------------------------------------------------------------------------------------------------------------------------------------------------------------------------------------------------------------------------------------------------------------------------------------------------------------------------------------------------------------------------------------------------------------------------------------------------------------------------------------------------------------------------------------------------------------------------------------------------------------------------------------------------------------------------------------------------------------------------------------------------------------------------------------------------------------------------------------------------------------------------------------------------------------------------------------------------------------------------------------------------------------------------------------------------------------------------------------------------------------------------------------------------------------------------------------------------------------------------------------------------------------------------------------------------------------------------------------------------------------------------------------------------------------------------------------------------------------------------------------------------------------------------------------------------------------------------------------------------------------------------------------------------------------------------------------------------------------------------------------------------------------------------------------------------------------------------------------------------------------------------------------------------------------------------------------------------------------------------------------------------------------------------------------------------------------------------------------------------------------------------------------------------------------------------------------------------------------------------------------------------------------------------------------------------------------------------------------------------------------------------------------------------------------------------------------------------------------------------------------------------------------------------------------------------------------------------------------------------------------------------------------------------------------------------------------------------------------------------------------------------------------------------------------------------------------------------------------------------------------------------------------------------------------------------------------------------------------------------|
| <b>What</b>                                                 | <p>The dietician, who initially met the participating patient face-to-face in the doctor's office, also provided online lifestyle coaching using the interactive web-based weight loss program. To gain access to the e-health tool, the patient had to fill out a comprehensive document online covering his/her medical history, health status, educational level and medicine intake, and accept the sharing of data between the dietician, the doctor and an exercise coach. When consent was given, the patient had access to scheduled web-based consultations and dialog with the dietician and exercise coach through embedded email-style messages sent within the website, an online community "Forum for Debate", and an embedded e-mail chat that connected the patient with other patients participating in the study and with private users, who had purchased access to the service to lose weight in a non-clinical setting.</p> <p>The system was set up to notify the user when new feedback was available and the users could also communicate with other users using functions like comments on entries of food and physical activity inputs and personal pictures.</p> <p>To kick off the initial weight loss period lasting approximately four months, a personal diet plan and exercise plan, based on the first week of day-to-day online registrations of weight measurements, meals and physical activity, was provided to the patient. The subsequent online consultations with the dietician took place weekly. The content of these consultations was at the professional discretion of the health professionals, but overall the focus was on the patient's registrations and questions, information in relation to the patient's weight status and recommendations on how to perform specific behaviours and set new goals. The exercise coach could be consulted online every fourth week in the first four months. If deemed necessary by the dietician, a patient could see the dietician face-to-face in the doctor's office in between the scheduled online consultations, within the first two to three months of the study period. Overall, face-to-face consultations in the doctor's office with the dietician were planned to take place every third and sixth month.</p> <p>Included BCT<sup>b</sup> from the CALO-RE taxonomy<sup>c</sup> (hereafter referred to as BCT): provide feedback on performance; provide instruction on how to perform the behaviour; provide information on consequences of the behaviour in <i>general</i> and <i>to the individual</i>; goal setting: behaviour and outcome; action planning; barrier identification/problem solving; relapse prevention and coping planning; prompt practice; plan social support/social change)</p> <p>The inputs described underneath this column are available to the patient and are an important part of the intervention. The patients can keep record of specified behaviour(s) on a daily, weekly or monthly basis. If the patients make their registrations daily, it becomes possible for both the health professionals and the patient to follow progress or setbacks closely, as the numbers and registrations are visualized with graphs and curves. (BCT: goal setting: behaviour and outcome; prompt self-monitoring of behaviour; provide feedback on performance; prompt practice)</p> |
| Online weight loss coaching by dietician and exercise coach |                                                                                                                                                                                                                                                                                                                                                                                                                                                                                                                                                                                                                                                                                                                                                                                                                                                                                                                                                                                                                                                                                                                                                                                                                                                                                                                                                                                                                                                                                                                                                                                                                                                                                                                                                                                                                                                                                                                                                                                                                                                                                                                                                                                                                                                                                                                                                                                                                                                                                                                                                                                                                                                                                                                                                                                                                                                                                                                                                                                                                                                                                                                                                                                                                                                                                                                                                                                                                  |
| Daily food intake input                                     | <p>Reporting of daily food intake: type of foods, amounts and time consumed can be compared to the personal diet plan. This makes it possible to advise and support the patient in getting a more balanced diet, e.g. eating smaller meals throughout the day, getting more vegetables and fruit, less carbs, fat and sugar and choosing whole-grain options when possible. (BCT: provide feedback on performance; prompt self-monitoring of behaviour)</p>                                                                                                                                                                                                                                                                                                                                                                                                                                                                                                                                                                                                                                                                                                                                                                                                                                                                                                                                                                                                                                                                                                                                                                                                                                                                                                                                                                                                                                                                                                                                                                                                                                                                                                                                                                                                                                                                                                                                                                                                                                                                                                                                                                                                                                                                                                                                                                                                                                                                                                                                                                                                                                                                                                                                                                                                                                                                                                                                                      |

1  
2  
3  
4  
5  
6  
7  
8  
9  
10  
11  
12  
13  
14  
15  
16  
17  
18  
19  
20  
21  
22  
23  
24  
25  
26  
27  
28  
29  
30  
31  
32  
33  
34  
35  
36  
37  
38  
39  
40  
41  
42  
43  
44  
45  
46  
47  
48  
49  
50  
51  
52  
53  
54  
55  
56  
57  
58  
59  
60

|                           |                                                                                                                                                                                                                                                                                                                                                                                                                                                                                                          |
|---------------------------|----------------------------------------------------------------------------------------------------------------------------------------------------------------------------------------------------------------------------------------------------------------------------------------------------------------------------------------------------------------------------------------------------------------------------------------------------------------------------------------------------------|
| My healthy cookbook       | The patients can access and share recipes and links to websites with healthy cooking instructions among each other, the feature is supervised by the dietician on request. (BCT: prompt practice; facilitate social comparison)                                                                                                                                                                                                                                                                          |
| Physical activity input   | Recording of type, time and intensity of any physical activity. The patients are taught how to set realistic goals and receive advice on different activities and how to implement them in daily life. They also learn how to convert activity into calories burnt, to get a better understanding of the balance between energy intake and energy output. (BCT: provide instruction on how to perform the behaviour; prompting generalization of a target behaviour; relapse prevention/coping planning) |
| Weight measurements input | Recording of current weight and goal weight, and reporting of waist measurements to display progress. The patients are instructed on how to do the measurements at the same time and in the same way every day. (BCT: prompt self-monitoring of behaviour and behavioural outcomes; provide feedback on performance)                                                                                                                                                                                     |
| Forum for debate          | Online community for users with a weight problem. The forum made it possible to exchange knowledge, gain social support from peers and build new relationships. The health professionals could also give advice to the forum users and encourage them to contact each other for support (BCT: planning social support/social change)                                                                                                                                                                     |
| <b>Who provided</b>       | Professional dietician and exercise coach                                                                                                                                                                                                                                                                                                                                                                                                                                                                |
| <b>How</b>                | Individually delivered via the e-health tool                                                                                                                                                                                                                                                                                                                                                                                                                                                             |
| <b>Where</b>              | Initial face-to-face meetings between the participating patient, their personal doctor and the dietician in the doctor's office. Then mainly web-based delivery.                                                                                                                                                                                                                                                                                                                                         |
| <b>When and how much</b>  | The initial face-to-face consultation with the dietician lasted approx. 45-60 minutes. Thereafter, in a four to six-month period, asynchronous web-based consultations were carried out once weekly with the dietician and every fourth week with the exercise coach. Thereafter (maintenance period), it was possible for both the patient and the dietician to request web-based consultations, typically monthly. (BCT: use of follow up prompts)                                                     |
| <b>Tailoring</b>          | Every participating patient received personalized web-based consultations from their designated dietician and exercise coach based on the patient's own inputs online.                                                                                                                                                                                                                                                                                                                                   |
| <b>Modifications</b>      | Only minor modifications were made during the study.                                                                                                                                                                                                                                                                                                                                                                                                                                                     |

---

<sup>a</sup> Based on Hoffmann et al 2014 <sup>18</sup>

<sup>b</sup>BCT: behaviour change techniques.

<sup>c</sup>CALO-RE: Coventry, Aberdeen and London-Refined taxonomy<sup>19</sup>

**Appendix 1.** (TiDieR) checklist<sup>a</sup> for the former Slankedoktor.dk - A web-based weight loss intervention

| TiDieR checklist item                                                                 | Description                                                                                                                                                                                                                                                                                                                                                                                                                                                                                                                                                                                                                                                                                                                                                                                                                                                                                                                                                                                                                                                                                                                                                                                                                                                                                                                                                                                                                                                                                                                                                                                                                                                                                                                                                                                                                                                                                                                                                                                                                                                                                                                                                                                                                                                                                                                                                                                                                                                                                                                                                                                                                                                                                                                                                                                                   |
|---------------------------------------------------------------------------------------|---------------------------------------------------------------------------------------------------------------------------------------------------------------------------------------------------------------------------------------------------------------------------------------------------------------------------------------------------------------------------------------------------------------------------------------------------------------------------------------------------------------------------------------------------------------------------------------------------------------------------------------------------------------------------------------------------------------------------------------------------------------------------------------------------------------------------------------------------------------------------------------------------------------------------------------------------------------------------------------------------------------------------------------------------------------------------------------------------------------------------------------------------------------------------------------------------------------------------------------------------------------------------------------------------------------------------------------------------------------------------------------------------------------------------------------------------------------------------------------------------------------------------------------------------------------------------------------------------------------------------------------------------------------------------------------------------------------------------------------------------------------------------------------------------------------------------------------------------------------------------------------------------------------------------------------------------------------------------------------------------------------------------------------------------------------------------------------------------------------------------------------------------------------------------------------------------------------------------------------------------------------------------------------------------------------------------------------------------------------------------------------------------------------------------------------------------------------------------------------------------------------------------------------------------------------------------------------------------------------------------------------------------------------------------------------------------------------------------------------------------------------------------------------------------------------|
| <p><b>What</b></p> <p>Online weight loss coaching by dietician and exercise coach</p> | <p>The dietician, who initially met the participating patient face-to-face in the doctor's office, also provided online lifestyle coaching using the interactive web-based weight loss program. To gain access to the e-health tool, the patient had to fill out a comprehensive document online covering his/her medical history, health status, educational level and medicine intake, and accept the sharing of data between the dietician, the doctor and an exercise coach. When consent was given, the patient had access to scheduled web-based consultations and dialog with the dietician and exercise coach through embedded email-style messages sent within the website, an online community "Forum for Debate", and an embedded e-mail chat that connected the patient with other patients participating in the study and with private users, who had purchased access to the service to lose weight in a non-clinical setting.</p> <p>The system was set up to notify the user when new feedback was available and the users could also communicate with other users using functions like comments on entries of food and physical activity inputs and personal pictures.</p> <p>To kick off the initial weight loss period lasting approximately four months, a personal diet plan and exercise plan, based on the first week of day-to-day online registrations of weight measurements, meals and physical activity, was provided to the patient. The subsequent online consultations with the dietician took place weekly. The content of these consultations was at the professional discretion of the health professionals, but overall the focus was on the patient's registrations and questions, information in relation to the patient's weight status and recommendations on how to perform specific behaviours and set new goals. The exercise coach could be consulted online every fourth week in the first four months. If deemed necessary by the dietician, a patient could see the dietician face-to-face in the doctor's office in between the scheduled online consultations, within the first two to three months of the study period. Overall, face-to-face consultations in the doctor's office with the dietician were planned to take place every third and sixth month.</p> <p>Included BCT<sup>b</sup> from the CALO-RE taxonomy<sup>c</sup> (hereafter referred to as BCT): provide feedback on performance; provide instruction on how to perform the behaviour; provide information on consequences of the behaviour in <i>general</i> and <i>to the individual</i>; goal setting; behaviour and outcome; action planning; barrier identification/problem solving; relapse prevention and coping planning; prompt practice; plan social support/social change)</p> |
| <p>Daily food intake input</p>                                                        | <p>The inputs described underneath this column are available to the patient and are an important part of the intervention. The patients can keep record of specified behaviour(s) on a daily, weekly or monthly basis. If the patients make their registrations daily, it becomes possible for both the health professionals and the patient to follow progress or setbacks closely, as the numbers and registrations are visualized with graphs and curves. (BCT: goal setting; behaviour and outcome; prompt self-monitoring of behaviour; provide feedback on performance; prompt practice)</p> <p>Reporting of daily food intake: type of foods, amounts and time consumed can be compared to the personal diet plan. This makes it possible to advise and support the patient in getting a more balanced diet, e.g. eating smaller meals throughout the day, getting more vegetables and fruit, less carbs, fat and sugar and choosing whole-grain options when possible. (BCT: provide feedback on performance; prompt self-monitoring of behaviour)</p>                                                                                                                                                                                                                                                                                                                                                                                                                                                                                                                                                                                                                                                                                                                                                                                                                                                                                                                                                                                                                                                                                                                                                                                                                                                                                                                                                                                                                                                                                                                                                                                                                                                                                                                                                |

|    |                           |                                                                                                                                                                                                                                                                                                                                                                                                                                                                                                          |
|----|---------------------------|----------------------------------------------------------------------------------------------------------------------------------------------------------------------------------------------------------------------------------------------------------------------------------------------------------------------------------------------------------------------------------------------------------------------------------------------------------------------------------------------------------|
| 1  |                           |                                                                                                                                                                                                                                                                                                                                                                                                                                                                                                          |
| 2  |                           |                                                                                                                                                                                                                                                                                                                                                                                                                                                                                                          |
| 3  |                           |                                                                                                                                                                                                                                                                                                                                                                                                                                                                                                          |
| 4  | My healthy cookbook       | The patients can access and share recipes and links to websites with healthy cooking instructions among each other, the feature is supervised by the dietician on request. (BCT: prompt practice; facilitate social comparison)                                                                                                                                                                                                                                                                          |
| 5  |                           |                                                                                                                                                                                                                                                                                                                                                                                                                                                                                                          |
| 6  |                           |                                                                                                                                                                                                                                                                                                                                                                                                                                                                                                          |
| 7  | Physical activity input   | Recording of type, time and intensity of any physical activity. The patients are taught how to set realistic goals and receive advice on different activities and how to implement them in daily life. They also learn how to convert activity into calories burnt, to get a better understanding of the balance between energy intake and energy output. (BCT: provide instruction on how to perform the behaviour; prompting generalization of a target behaviour; relapse prevention/coping planning) |
| 8  |                           |                                                                                                                                                                                                                                                                                                                                                                                                                                                                                                          |
| 9  |                           |                                                                                                                                                                                                                                                                                                                                                                                                                                                                                                          |
| 10 |                           |                                                                                                                                                                                                                                                                                                                                                                                                                                                                                                          |
| 11 |                           |                                                                                                                                                                                                                                                                                                                                                                                                                                                                                                          |
| 12 |                           |                                                                                                                                                                                                                                                                                                                                                                                                                                                                                                          |
| 13 |                           |                                                                                                                                                                                                                                                                                                                                                                                                                                                                                                          |
| 14 |                           |                                                                                                                                                                                                                                                                                                                                                                                                                                                                                                          |
| 15 | Weight measurements input | Recording of current weight and goal weight, and reporting of waist measurements to display progress. The patients are instructed on how to do the measurements at the same time and in the same way every day. (BCT: prompt self-monitoring of behaviour and behavioural outcomes; provide feedback on performance)                                                                                                                                                                                     |
| 16 |                           |                                                                                                                                                                                                                                                                                                                                                                                                                                                                                                          |
| 17 |                           |                                                                                                                                                                                                                                                                                                                                                                                                                                                                                                          |
| 18 |                           |                                                                                                                                                                                                                                                                                                                                                                                                                                                                                                          |
| 19 |                           |                                                                                                                                                                                                                                                                                                                                                                                                                                                                                                          |
| 20 | Forum for debate          | Online community for users with a weight problem. The forum made it possible to exchange knowledge, gain social support from peers and build new relationships. The health professionals could also give advice to the forum users and encourage them to contact each other for support (BCT: planning social support/social change)                                                                                                                                                                     |
| 21 |                           |                                                                                                                                                                                                                                                                                                                                                                                                                                                                                                          |
| 22 |                           |                                                                                                                                                                                                                                                                                                                                                                                                                                                                                                          |
| 23 |                           |                                                                                                                                                                                                                                                                                                                                                                                                                                                                                                          |
| 24 |                           |                                                                                                                                                                                                                                                                                                                                                                                                                                                                                                          |
| 25 |                           |                                                                                                                                                                                                                                                                                                                                                                                                                                                                                                          |
| 26 | <b>Who provided</b>       | Professional dietician and exercise coach                                                                                                                                                                                                                                                                                                                                                                                                                                                                |
| 27 |                           |                                                                                                                                                                                                                                                                                                                                                                                                                                                                                                          |
| 28 | <b>How</b>                | Individually delivered via the e-health tool                                                                                                                                                                                                                                                                                                                                                                                                                                                             |
| 29 |                           |                                                                                                                                                                                                                                                                                                                                                                                                                                                                                                          |
| 30 | <b>Where</b>              | Initial face-to-face meetings between the participating patient, their personal doctor and the dietician in the doctor's office. Then mainly web-based delivery.                                                                                                                                                                                                                                                                                                                                         |
| 31 |                           |                                                                                                                                                                                                                                                                                                                                                                                                                                                                                                          |
| 32 | <b>When and how much</b>  | The initial face-to-face consultation with the dietician lasted approx. 45-60 minutes. Thereafter, in a four to six-month period, asynchronous web-based consultations were carried out once weekly with the dietician and every fourth week with the exercise coach. Thereafter (maintenance period), it was possible for both the patient and the dietician to request web-based consultations, typically monthly. (BCT: use of follow up prompts)                                                     |
| 33 |                           |                                                                                                                                                                                                                                                                                                                                                                                                                                                                                                          |
| 34 |                           |                                                                                                                                                                                                                                                                                                                                                                                                                                                                                                          |
| 35 |                           |                                                                                                                                                                                                                                                                                                                                                                                                                                                                                                          |
| 36 |                           |                                                                                                                                                                                                                                                                                                                                                                                                                                                                                                          |
| 37 |                           |                                                                                                                                                                                                                                                                                                                                                                                                                                                                                                          |
| 38 |                           |                                                                                                                                                                                                                                                                                                                                                                                                                                                                                                          |
| 39 | <b>Tailoring</b>          | Every participating patient received personalized web-based consultations from their designated dietician and exercise coach based on the patient's own inputs online.                                                                                                                                                                                                                                                                                                                                   |
| 40 |                           |                                                                                                                                                                                                                                                                                                                                                                                                                                                                                                          |
| 41 |                           |                                                                                                                                                                                                                                                                                                                                                                                                                                                                                                          |
| 42 | <b>Modifications</b>      | Only minor modifications were made during the study.                                                                                                                                                                                                                                                                                                                                                                                                                                                     |
| 43 |                           |                                                                                                                                                                                                                                                                                                                                                                                                                                                                                                          |
| 44 |                           |                                                                                                                                                                                                                                                                                                                                                                                                                                                                                                          |
| 45 |                           |                                                                                                                                                                                                                                                                                                                                                                                                                                                                                                          |

---

<sup>a</sup> Based on Hoffmann et al 2014 <sup>18</sup>

<sup>b</sup>BCT: behaviour change techniques.

<sup>c</sup>CALO-RE: Coventry, Aberdeen and London-Refined taxonomy<sup>19</sup>

**Table 1**

Consolidated criteria for reporting qualitative studies (COREQ): 32-item checklist

| No                                   | Item                                     | Guide questions/description                                                                                                                                     | Page |
|--------------------------------------|------------------------------------------|-----------------------------------------------------------------------------------------------------------------------------------------------------------------|------|
| <b>Domain 1:</b>                     |                                          |                                                                                                                                                                 |      |
| <b>Research team and reflexivity</b> |                                          |                                                                                                                                                                 |      |
| Personal Characteristics             |                                          |                                                                                                                                                                 |      |
| 1.                                   | Interviewer/facilitator                  | Which author/s conducted the interview or focus group?                                                                                                          | 4    |
| 2.                                   | Credentials                              | What were the researcher's credentials? <i>E.g. PhD, MD</i>                                                                                                     | 1    |
| 3.                                   | Occupation                               | What was their occupation at the time of the study?                                                                                                             | 1    |
| 4.                                   | Gender                                   | Was the researcher male or female? Male: CJB,JS, JBN. Female: JC                                                                                                |      |
| 5.                                   | Experience and training                  | What experience or training did the researcher have?                                                                                                            | 1    |
| Relationship with participants       |                                          |                                                                                                                                                                 |      |
| 6.                                   | Relationship established                 | Was a relationship established prior to study commencement?                                                                                                     | 4    |
| 7.                                   | Participant knowledge of the interviewer | What did the participants know about the researcher? <i>e.g. personal goals, reasons for doing the research</i>                                                 | 4    |
| 8.                                   | Interviewer characteristics              | What characteristics were reported about the interviewer/facilitator? <i>e.g. Bias, assumptions, reasons and interests in the research topic</i>                | 4    |
| <b>Domain 2: study design</b>        |                                          |                                                                                                                                                                 |      |
| Theoretical framework                |                                          |                                                                                                                                                                 |      |
| 9.                                   | Methodological orientation and Theory    | What methodological orientation was stated to underpin the study? <i>e.g. grounded theory, discourse analysis, ethnography, phenomenology, content analysis</i> | 5    |
| Participant selection                |                                          |                                                                                                                                                                 |      |
| 10.                                  | Sampling                                 | How were participants selected? <i>e.g. purposive, convenience, consecutive, snowball</i>                                                                       | 3    |
| 11.                                  | Method of approach                       | How were participants approached? <i>e.g. face-to-face, telephone, mail, email</i>                                                                              | 3    |
| 12.                                  | Sample size                              | How many participants were in the study?                                                                                                                        | 3    |
| 13.                                  | Non-participation                        | How many people refused to participate or dropped out? Reasons?                                                                                                 | 3    |
| Setting                              |                                          |                                                                                                                                                                 |      |
| 14.                                  | Setting of data collection               | Where was the data collected? <i>e.g. home, clinic, workplace</i>                                                                                               | 4    |
| 15.                                  | Presence of non-participants             | Was anyone else present besides the participants and researchers?                                                                                               | 4    |
| 16.                                  | Description of sample                    | What are the important characteristics of the sample? <i>e.g. demographic data, date</i>                                                                        | 3    |
| Data collection                      |                                          |                                                                                                                                                                 |      |
| 17.                                  | Interview guide                          | Were questions, prompts, guides provided by the authors? Was it pilot tested?                                                                                   | 5    |
| 18.                                  | Repeat interviews                        | Were repeat interviews carried out? If yes, how many?                                                                                                           | 5    |
| 19.                                  | Audio/visual recording                   | Did the research use audio or visual recording to collect the data?                                                                                             | 5    |

1  
2  
3  
4  
5  
6  
7  
8  
9  
10  
11  
12  
13  
14  
15  
16  
17  
18  
19  
20  
21  
22  
23  
24  
25  
26  
27  
28  
29  
30  
31  
32  
33  
34  
35  
36  
37  
38  
39  
40  
41  
42  
43  
44  
45  
46  
47  
48  
49  
50  
51  
52  
53  
54  
55  
56  
57  
58  
59  
60

| No                                              | Item                           | Guide questions/description                                                                                                                 | Page          |
|-------------------------------------------------|--------------------------------|---------------------------------------------------------------------------------------------------------------------------------------------|---------------|
| 20.                                             | Field notes                    | Were field notes made during and/or after the interview or focus group?                                                                     | 5             |
| 21.                                             | Duration                       | What was the duration of the interviews or focus group?                                                                                     | 4             |
| 22.                                             | Data saturation                | Was data saturation discussed?                                                                                                              | 5             |
| 23.                                             | Transcripts returned           | Were transcripts returned to participants for comment and/or correction?                                                                    | 5             |
| <b>Domain 3:<br/>analysis and<br/>findingsz</b> |                                |                                                                                                                                             |               |
| Data analysis                                   |                                |                                                                                                                                             |               |
| 24.                                             | Number of data coders          | How many data coders coded the data?                                                                                                        | 5             |
| 25.                                             | Description of the coding tree | Did authors provide a description of the coding tree?                                                                                       | 5             |
| 26.                                             | Derivation of themes           | Were themes identified in advance or derived from the data?                                                                                 | 5             |
| 27.                                             | Software                       | What software, if applicable, was used to manage the data?                                                                                  | 5             |
| 28.                                             | Participant checking           | Did participants provide feedback on the findings?                                                                                          | 5             |
| Reporting                                       |                                |                                                                                                                                             |               |
| 29.                                             | Quotations presented           | Were participant quotations presented to illustrate the themes / findings?<br>Was each quotation identified? e.g. <i>participant number</i> | 6,<br>7, 8, 9 |
| 30.                                             | Data and findings consistent   | Was there consistency between the data presented and the findings?                                                                          | 5             |
| 31.                                             | Clarity of major themes        | Were major themes clearly presented in the findings?                                                                                        | 6             |
| 32.                                             | Clarity of minor themes        | Is there a description of diverse cases or discussion of minor themes?                                                                      | 9, 10         |



# BMJ Open

## Drivers for successful long-term lifestyle change, the role of e-health: a qualitative interview study

|                                 |                                                                                                                                                                                                                                                                                                                                                                                                                                                                                                                                                                                                                                                                                                                                                 |
|---------------------------------|-------------------------------------------------------------------------------------------------------------------------------------------------------------------------------------------------------------------------------------------------------------------------------------------------------------------------------------------------------------------------------------------------------------------------------------------------------------------------------------------------------------------------------------------------------------------------------------------------------------------------------------------------------------------------------------------------------------------------------------------------|
| Journal:                        | <i>BMJ Open</i>                                                                                                                                                                                                                                                                                                                                                                                                                                                                                                                                                                                                                                                                                                                                 |
| Manuscript ID                   | bmjopen-2017-017466.R2                                                                                                                                                                                                                                                                                                                                                                                                                                                                                                                                                                                                                                                                                                                          |
| Article Type:                   | Research                                                                                                                                                                                                                                                                                                                                                                                                                                                                                                                                                                                                                                                                                                                                        |
| Date Submitted by the Author:   | 26-Jan-2018                                                                                                                                                                                                                                                                                                                                                                                                                                                                                                                                                                                                                                                                                                                                     |
| Complete List of Authors:       | Brandt, Carl; Syddansk Universitet Det Sundhedsvidenskabelige Fakultet, Research unit for General practice, Department for public health; Syddansk Universitet Det Sundhedsvidenskabelige Fakultet, CIMT - Centre for Innovative Medical Technology<br>Clemensen, Jane; Odense Universitetshospital, Hans Christian Andersen's Childrens Hospital ; Syddansk Universitet Det Sundhedsvidenskabelige Fakultet, CIMT - Centre for Innovative Medical Technology<br>Nielsen, Jesper; Syddansk Universitet Det Sundhedsvidenskabelige Fakultet, Research Unit of General Practice, Dept. of Public Health<br>Søndergaard, Jens; Syddansk Universitet Det Sundhedsvidenskabelige Fakultet, Research Unit of General Practice, Dept. of Public Health |
| <b>Primary Subject Heading</b>: | General practice / Family practice                                                                                                                                                                                                                                                                                                                                                                                                                                                                                                                                                                                                                                                                                                              |
| Secondary Subject Heading:      | Patient-centred medicine, Qualitative research, Diabetes and endocrinology, Communication                                                                                                                                                                                                                                                                                                                                                                                                                                                                                                                                                                                                                                                       |
| Keywords:                       | behavioral outcome, weight loss, behavioral change support system, Telemedicine < BIOTECHNOLOGY & BIOINFORMATICS, lifestyle change, obesity                                                                                                                                                                                                                                                                                                                                                                                                                                                                                                                                                                                                     |
|                                 |                                                                                                                                                                                                                                                                                                                                                                                                                                                                                                                                                                                                                                                                                                                                                 |

SCHOLARONE™  
Manuscripts

1  
2  
3  
4  
5 **Drivers for successful long-term lifestyle change, the role of e-health:**  
6 **a qualitative interview study**  
7  
8  
9

10  
11 **Corresponding author: Carl J. Brandt, MD, GP**  
12 **Research Unit of General Practice, Dept. of Public Health**  
13 **University of Southern Denmark**  
14 **Odense, Denmark**  
15 **e-mail: cbrandt@health.sdu.dk**  
16

17  
18 Jane Clemensen RN, Professor, PhD  
19 Hans Christian Andersen's Childrens Hospital and  
20 CIMT - Centre for Innovative Medical Technology  
21 University of Southern Denmark and Odense University Hospital  
22 Odense, Denmark  
23 e-mail: Jane.Clemensen@rsyd.dk  
24

25  
26 Jesper Bo Nielsen, Professor PhD  
27 Research Unit of General Practice, Dept. of Public Health  
28 University of Southern Denmark  
29 Odense, Denmark  
30 e-mail: jbn Nielsen@health.sdu.dk  
31

32 Jens Søndergaard, MD, Professor, PhD  
33 Research Unit of General Practice, Dept. of Public Health  
34 University of Southern Denmark  
35 Odense, Denmark  
36 e-mail: jsoendergaard@health.sdu.dk  
37

38  
39 **ABSTRACT**

40 **Objectives:** Assisting patients in lifestyle change using collaborative e-health tools can be an  
41 efficient treatment for noncommunicable diseases like diabetes, cardiovascular disease and  
42 COPD that are caused or aggravated by unhealthy living in the form of unhealthy diet, physical  
43 inactivity or tobacco smoking. In a prospective pilot study we tested an online collaborative e-  
44 health tool in General Practice. The aim of the study was to identify drivers of importance for  
45 long-term personal lifestyle changes from a patient perspective when using a collaborative e-  
46 health tool, including the support of peers and healthcare professionals.  
47

48 **Setting:** General practice clinics in the Region of Southern Denmark.

49 **Participants:** Ten overweight patients who had previously successfully used a hybrid online  
50 collaborative e-health tool with both face-to-face and online consultations to lose weight.

51 **Results:** The main themes identified were facilitators, barriers and support from family and  
52 peers. Establishment of a trustworthy relationship with the healthcare professionals were of  
53 paramount importance. It was important for the patients to monitor the measurable  
54 outcomes with realistic goals and feedback from a trusted person. Often, significant life events  
55 were identified as catalysts for successful long-term lifestyle changes. Dominant barriers to  
56 change were perception of insurmountable obstacles, experience of lack of self-efficacy and  
57  
58  
59

1  
2  
3  
4 excess eating of high calorie food. Finally experiencing of trustworthy person-to-person  
5 forums, need for acknowledgement from referent others and support from family and peers  
6 were important drivers for long-term lifestyle change.

7 **Conclusion:** The most important driver in long-term weight loss was a strong relationship  
8 with a healthcare professional. Collaborative e-health tools can support the relationship and  
9 behavioural changes through monitoring and relevant feedback. The support from family and  
10 peers also matters, and long-term success depends on the ability to establish strong, positive  
11 support on a day-to-day basis.  
12

## 13 **Strengths and limitations of this study**

- 14 • This study identified drivers for successful long-term lifestyle change among patients having  
15 used a collaborative online e-health tool in general practice.
- 16 • This study mainly included patients with successful long-term lifestyle change, therefore  
17 reasons for lack of engagement and non-adherence might have been overseen.
- 18 • Authors CJB and JS both are General Practitioners, which might have influenced their  
19 prejudices however, all authors took this in to consideration when analysing the data.  
20  
21  
22

## 23 **BACKGROUND**

24 Many noncommunicable diseases such as diabetes, cardiovascular diseases, cancer and COPD  
25 are caused or aggravated by common preventable risk factors, e.g. tobacco use, unhealthy  
26 diet, and physical inactivity. Although being overweight and having an unhealthy lifestyle can  
27 be uncomfortable, changing lifestyle is extremely difficult. For weight loss to have a positive  
28 impact on health, it needs to be sustainable and especially long-term lifestyle changes  
29 (defined as more than 12 to 18 months) have proven difficult.<sup>1</sup> One of the major challenges for  
30 lifestyle change seems to be that social relationships that are often challenged by peers, who  
31 do not understand the importance of the lifestyle change to the person.<sup>2</sup> This might be one of  
32 the reasons why patients find it difficult to acknowledge the complexities and ambivalences  
33 that are part of using collaborating e-health tools.<sup>3</sup>  
34  
35

36 Even though recent systematic reviews have concluded that Internet and mobile  
37 interventions can improve lifestyle behaviours, most studies had no more than three to six  
38 months' follow up, which emphasizes the need for research in long-term interventions.<sup>4, 5, 6</sup>  
39 Most e-health tools and electronic lifestyle monitors use behavioural change techniques such  
40 as self-monitoring, goal setting and social support.<sup>7</sup> In systematic reviews, adding personal  
41 feedback seems to improve outcome in comparison to automated response feedback.<sup>8</sup>  
42  
43

44 Several key theories of change from the field of behavioural science are employed in many  
45 lifestyle change and e-health tools, and have been used in this study as well. In accordance  
46 with social cognitive theory (SCT), a number of constructs come into play when patients try to  
47 change lifestyle. SCT has five constructs: (1) measurable outcome i.e. steps, (2) proximal goal  
48 setting i.e. daily breakfast, (3) procedural knowledge instead of content knowledge i.e. to walk  
49 10000 steps daily instead of "live healthy", (4) perceived self-efficacy through experiences of  
50 reaching planned goals, and (5) social structural factors i.e. the influence of experiencing  
51 support (or obstruction) for a healthier lifestyle from family or peers.<sup>9</sup> The Social Action  
52 Theory (SAT) takes it one step further and explains how goal-directed action can lead to  
53 cognitive change that ultimately restructures the environmental context, including social  
54 relations, for long-term lifestyle change.<sup>10</sup> Finally, the theory of triadic influence (TTI) outlines  
55 that to be successful, three streams of information need to be recognised: the intrapersonal  
56  
57  
58  
59

stream, the interpersonal stream and the social environmental stream, indicating the complexity of helping a patient change from an unhealthy lifestyle to a healthy lifestyle.<sup>11</sup>

We therefore anticipate that the outcome expectations and goal setting need to be developed in collaboration between a health coaching professional and the patient in order to have a longer-lasting effect for the patient. The Internet and the rise of social media have changed our social patterns, and it has become possible to build relationships via digital tools. Some studies suggest that certain groups of patients might also benefit from this<sup>12</sup>.

In a previous study, we found that a collaborative online e-health tool could support a significant weight loss of 7,0 kg during a 20 month period in a general practice setting. The collaborative e-health tool was used in a hybrid manner beginning with a personal meeting and included various behavioural change techniques such as joint goal setting, tailored information, self-monitoring, lifestyle coaching, in-person feedback, reminders, and person-to-person support.<sup>13</sup> A second version of the same collaborative e-health tool showed similar results for men with diabetes, who had an average 5,4 kg weight loss during a 12 month period (compared to 2,8 kg for a control group) in a municipal setting. Semi-structured interviews with patients in the later study suggested that the initial face-to-face meeting was important for building a trustworthy relationship.<sup>14</sup> But overall, the important drivers for such a lifestyle change and what role the collaborative e-health tool played has not previously been addressed.

Hence we aimed to identify drivers of importance for weight loss management for patients who had used a hybrid collaborative online e-health tool for weight loss taking into account the patient's perspectives having experienced a collaborative e-health model.

## **METHODS**

### **Design**

To create new knowledge about the essential themes for this group of patients we used qualitative, semi-structured, individual interviews to explore the field without distraction.

### **Context**

Ten overweight patients from a rural area in the Region of Southern Denmark were recruited for the study. They had all participated in the previous study that utilised a hybrid collaborative online e-health tool also involving face-to-face meetings.

### **Sampling**

Purposive sampling was conducted among patients who had participated in the prior study with regard to gender, age and weight loss. Three men and seven women, ages 34 to 71, average age 52, with an average weight of 109 kg and a median weight loss of 10.5 kg (from 2 to 16 kg) during the 20-month study period were invited. Six had been consistently interacting with the designated healthcare professional during the study, two stopped responding to information given, one left the study early and one never started. Invitations for this qualitative study were by phone and none declined the invitation.

### **The intervention**

The collaborative online e-health tool was used as a supplemental tool for a dietician working in general practice, making sure that the relationship was established in-person before

beginning online communication. The same dietician met the patient in the clinic and handled the online lifestyle coaching with the patient. Apart from the dietician, the patients could meet and share health data/information with other patients in the online forums established through the collaborative e-health tool (Appendix 1). This developed into a strong community where it was also possible for patients to discuss many personal issues<sup>13</sup>.

### Interview Procedure

The interviews presented in this study took place 5 years after the end of the initial intervention. All patients were interviewed for 45 minutes to 1 hour and a relaxed atmosphere was achieved by holding the interviews one to one in the patients' homes, except for two who preferred to be interviewed in the medical centre. All interviews were carried out by CJB, who has worked as a GP for more than ten years and with different e-health tools for more than 15 years, including the e-health tool used in the intervention. Before every interview, CJB briefly explained the purpose and nature of the research, answered questions, and provided participants with a description of the study in layman's terms. CJB explained to the patients that the interview data would be anonymized, and an informed consent document was signed by both the patient and CJB. The ethics committee for the Region of Southern Denmark reviewed the protocol and found that the Medical Research Involving Human Subjects Act does not apply to this study.<sup>15</sup> A formal approval was therefore not required for this study. We did obtain written consent nevertheless, due to the sensitivity of the subject matter.

Table 1. Interview guide

| Fields of interest                                          | Probing questions                                                                                                                                                                              |
|-------------------------------------------------------------|------------------------------------------------------------------------------------------------------------------------------------------------------------------------------------------------|
| Disease history                                             | Do you have any diseases? What does that mean to you? What does it mean for your wellbeing? How do you see your health in general?                                                             |
| Experience with taking action to change lifestyle           | Have you ever taken the initiative to improve or change your lifestyle? How did it go?                                                                                                         |
| Experience with support from health professionals and peers | Who has helped you with your health challenges? Who has been the best to help you? How? What was the worst experience? How?                                                                    |
| Experience with and thoughts about e-health tools           | Do you have a smartphone? Have you ever used apps or the Internet in relation to your health or wellbeing? Have you found recipes on the internet? Have you used apps in relation to exercise? |

The semi-structured interviews followed an interview guide, which resulted in an iterative approach, for emerging themes and perspectives to be explored.<sup>16</sup> The semi-structured interviews were segmented into four fields of interest: 1) Patient disease history, 2) Patient experiences with taking action to change lifestyle, 3) Patient experiences with support from health professionals and peers, and 4) Patient experiences with and thoughts about e-health tools. See Table 1.

1  
2  
3  
4 The interview guide was tested among family and colleagues prior to use. All interviews were  
5 audiotaped. Field notes were made during and immediately after the interviews.  
6

### 7 **Analysis**

8 Interviews were transcribed and uploaded to a common database verbatim. Transcripts were  
9 analysed by the researchers (CJB, JC, JBN and JS) using thematic analysis. An explorative  
10 approach was applied for systematic text condensation.<sup>17 18</sup> The process began with reading  
11 the transcripts. After the initial 4 interviews, the authors conducted an overview of the  
12 transcripts and identified themes of importance. The authors then agreed on codes across  
13 ideas and themes that could be categorized. CJB then coded all transcripts in accordance with  
14 the agreed codes. The coded transcripts were shared and discussed. Data from each theme  
15 were condensed and summarized into concepts and generalized descriptions. Several times  
16 throughout the process, identified themes were compared between the different researchers.  
17 Overlap was identified and consistency was reached. Coinciding themes of importance were  
18 then put into a common framework. Data collection was terminated due to saturation when  
19 no new themes emerged. The quotes that best illustrated the different themes and subthemes  
20 were selected and translated from Danish to English by CJB. All quotes were then evaluated by  
21 the remaining authors and changes were made to reach agreement among all authors.  
22  
23  
24  
25

## 26 **RESULTS**

27 All but one of the participants used smartphones or tablets. One only used a traditional cell  
28 phone and had his wife entering data via a computer. Five years after the initial intervention,  
29 they all still used the Internet or apps for benefitting their health, even though they no longer  
30 had access to the intervention tool, [www.slankedoktor.dk](http://www.slankedoktor.dk), described in accordance with  
31 (TIDieR) checklist<sup>19</sup> and the CALO-RE: Coventry, Aberdeen and London-Refined taxonomy<sup>20</sup>  
32 in Appendix 1.. Everyone looked up recipes, some had joined weight-loss Facebook groups,  
33 and some used an app-based service monitoring their physical activity. They were not aware  
34 of all the functionality that could support them for free using their smartphones, but the  
35 majority acknowledged that the provided collaborative e-health tool had helped them during  
36 the intervention period. Following the two years' intervention study five years ago, some had  
37 gained weight, but not to the level before the intervention. We identified three main themes:  
38 facilitators, barriers, and the support of family and peers (see Table 2).  
39  
40  
41  
42

### 43 **Facilitators for lifestyle change**

44 A number of subthemes were identified to facilitate long-term lifestyle change, but over all  
45 establishing an honest relationship with a healthcare professional, who were trusted to  
46 monitor the patient and able to set realistic goals with the patient were most important  
47  
48

### 49 **The establishment of an honest and trustworthy relationship with the health 50 professional**

For all successful lifestyle changes that had lasted for more than three months, the patient could refer to a person whom they trusted and who supported them in their efforts to lose weight. They all had a good and trustworthy relationship with their GPs. Six found support from the dietician involved in the study (including online support), one found support from the GP nurse, one found support from an online coach, one from a spiritual leader, and one

Table 2. Summary of main themes

| Facilitators                                                                             | Barriers                                   | Support from peers and family                                |
|------------------------------------------------------------------------------------------|--------------------------------------------|--------------------------------------------------------------|
| The establishment of an honest and trustworthy relationship with the health professional | The perception of insurmountable obstacles | Experience of honest and trustworthy person-to-person forums |
| Monitoring the behavioural change with personal feedback                                 | Experience of lack of self-efficacy        | Need for acknowledgement from referent others                |
| Goal setting                                                                             | Excess eating of high calorie food         | Support from partner/spouse                                  |
| Experiencing significant life events igniting the right time for action                  |                                            |                                                              |

had not been successful. The four (three men and one woman) who had not found support in the dietician in the intervention were the least successful in the pilot study.<sup>13</sup>

I think it was really nice to see CA (the dietician), also because she could see it was my head that controlled me a lot. (P2, female)

Some of the patients said that they did not trust the dietician who had been assigned to them nor did they trust the e-health tool, and they identified the lack of trust as the main reason for discontinuing the intervention or seeking other guidance.

I can't have a settled plan... well, it is more when I told it to her then I said: "it does not work for me. I can't use it in that way", and then I actually did not come back.... (P5, male)

I felt the trust I had showed had been misused in a way, not that I don't want to join a group and talk about a lot of things, what I have eaten etc....., but all of a sudden another dietician sent me messages and then I said: "now it stops, now it (the information) is off track, that I don't want it and feel I can't control it. (P9, male)

One of the participants established contact with another online lifestyle coach who helped him to achieve a significant weight loss without a single face-to-face meeting, which means

1  
2  
3  
4 that seven out of ten had used online support for their weight loss and three had found face-  
5 to-face support from alternative sources that were better for them.  
6

### 7 **Monitoring the behavioural change with personal feedback**

8 All patients found it positive that their health professional of choice showed interest in their  
9 self-measurements.  
10

11 One who had to see that I kept my weight. If not, I would have said I had done it  
12 without having done it..... to satisfy others.....  
13 ...and I can't cheat it (An objective activity monitoring fitness app:  
14 "Endomondo"). It is not possible for me to pretend I have gone for a walk when I  
15 haven't. (P1, female)  
16  
17

### 18 **Goal setting**

19 Individual goal setting was recognized as difficult. Several patients revealed that they had  
20 daily or weekly goals for activity, diet or weight. Daily goals seemed most effective due to the  
21 fact that action was needed within small, discrete windows of time.  
22

23 Today.. I just have to walk my 10.000 steps, and swim two times a week. And  
24 then I eat what I always have eaten except I don't eat that stof (candy), because  
25 I'm not tired, so I don't need it. (P8, female)  
26 Then I stopped eating candy, and I have neither bought or had candy for three  
27 months and I have lost 7 kg. (P3, female)  
28  
29

### 30 **Experienced life events perceived as significant, igniting the right time for action**

31 All patients revealed how a specific situation or life event had ignited their lifestyle change.  
32 Five revealed that a specific incident in their family changed their way of thinking with regard  
33 to their lifestyle. Three had experienced that their doctor or another health professional had  
34 made it clear to them that they had to do something. Two had received an effective treatment  
35 that had helped them with their weight control or tiredness to a degree that made it possible  
36 to act in a different way.  
37  
38

39 ....It was a very specific episode that ignited it (the lifestyle change)... I came  
40 home one night very tired.... My husband is on his way to bed, and then he says:  
41 "by the way the kids and I found a bag of candy in your handbag that we ate - I  
42 hope that is okay?" I then went completely mad and wanted a divorce... , but then  
43 during the night, I realized that I had a problem. I had three kids, and I wanted to  
44 break up my marriage due to a bag of candy..... (P10, female)  
45  
46

### 47 **Barriers to lifestyle change**

48 The patients gave many reasons as to why they had difficulties keeping the weight off, both in  
49 their own perception of insurmountable obstacles, experience of lack of self-efficacy and in  
50 having difficulties with excess eating of high calorie foods, which is explained in more detail  
51 below.  
52

### 53 **The perception of insurmountable obstacles**

54 Several patients described how they used illnesses or other deficits to explain their lack of  
55 ability to do something about their health.  
56  
57  
58  
59  
60



1  
2  
3  
4 I had this knot under my left foot removed in surgery two years ago. Three  
5 months ago, I had the same operation in the other foot. So I'm not able to do it  
6 (exercise), and I still can't use regular footwear. I still use sandals. (P1, female)  
7

### 8 **Experience of lack of self-efficacy**

9 Several patients explained how they often felt tempted to indulge in high-calorie foods, and  
10 that their confidence in being able to avoid inappropriate behaviour was low.  
11

12 It is probably because I can eat a little candy again or buy a chocolate bar when  
13 I'm out shopping.... And I have problems saying no thanks. (P2, female)  
14  
15

### 16 **Excess eating of high calorie foods**

17 Many of the patients had experiences with their weight going up and down. When they  
18 allowed themselves to eat even small amounts of sweets, their weight went up very quickly.  
19

20 "It happened very fast. I think it was in December ... I allowed myself to eat a  
21 cookie... by the end of January, I had gained 10 kg.....Just like an alcoholic can't  
22 drink half a bottle of wine, then I will never be able to eat 100g of chocolate  
23 without having to really hold myself back. (P10, female)  
24  
25

### 26 **Support from peers and family**

27 As severely overweight people, it is obvious to everyone they meet that they have challenges  
28 in relation to their lifestyle. The support from friends and close family was found important,  
29 and intrinsic factors that inhibit weight loss can be potentiated or challenged when the person  
30 came into contact with other supportive individuals.  
31

### 32 **The experience of honest and trustworthy person-to-person forums**

33 Most patients found support from friends they had met in their struggle to lose weight. Both  
34 relations established in traditional meetings and online forums were described as important.  
35  
36

37 "Then I have my friend, whom I met when I joined Weight Watchers. She has all  
38 these ideas as to how to combine different food ingredients..... and my other  
39 friend has that as well, but she has now joined this online group low fat, high  
40 something....." (P6, female)  
41  
42

43 Several of the patients used Facebook or apps, where they communicated with friends.  
44 Several of the patients described how they experienced that they were able to communicate  
45 more honestly with their online friends.  
46

47 ...I'm more in need of a closed group for people who have the same problems as I  
48 have or at least are in the same position as I am" and "I could do it (be honest) if  
49 it was online, but not if I had to look them in the eyes."  
50

51 "If it is someone I would never meet, then I could be honest, but as soon I know  
52 that it is someone I am going to meet, then I add to the story. (P2, female)  
53

### 54 **Need for acknowledgement from referent others**

55 To sustain a lifestyle change, most of the patients said that the most important person was  
56 their partner/spouse or another person close to them who continued to regard the lifestyle  
57 change as important. For most of the patients, the dietician or another healthcare professional  
58  
59

1  
2  
3  
4 had been the most important person during the period of lifestyle change. After the study, a  
5 number of the patients returned to their old habits, and the lack of support was missed.  
6

7 "The worst thing was that nobody called me up and said: "Why is it you have not  
8 scheduled a new appointment?" (P2, female)  
9

10 In the online setting, acknowledgement also made a difference to a majority of the patients.  
11

12 I used it (the forum in the e-health tool) a lot. ...The fact that I could be honest  
13 and put my cards on the table, because they all knew how it is to have the urge to  
14 drive to the next baker and empty the store on the way home. So it was actually  
15 very important to me that I had that forum. (P10, female)  
16  
17

18 "...It is the same with Endomondo (an activity tracker app). I have friends there.  
19 And then I have to show I walk. Not to make them believe I'm not active. (P7,  
20 female)  
21  
22

### 23 **Support from partner/spouse**

24 All patients shared their goals and achievements with their close family. Most found their  
25 family supportive, but a minority also revealed that the partner/spouse took a judgmental  
26 position with regard to their lifestyle choices and some tried to support their partner/spouse  
27 through loving teasing.  
28  
29

30 ..Before I lost weight my breathing was really bad ... and I couldn't sleep at night  
31 so I would fall asleep during the day... then I would be reviled by N (partner):  
32 "Now you are sitting falling asleep again" I could sit in a chair and fall asleep. (P4,  
33 male)  
34  
35

## 36 **DISCUSSION**

37 We aimed to identify important drivers for long-term lifestyle change for patients using a  
38 hybrid collaborative e-health tool and found that establishing a trustworthy relationship with  
39 a healthcare professional doing lifestyle coaching was the most important factor for a long-  
40 term successful lifestyle change. This matches the social ecological point of view that  
41 establishing a good relationship with the patient is of paramount importance for coaching  
42 patients to make difficult decisions.<sup>9 21 22</sup> To establish a trustworthy relationship with a  
43 healthcare professional can be difficult in a fully online e-health tool. The provided e-health  
44 tool in this study utilised a hybrid model, both in-person and online, that seemed to  
45 strengthen the relationship with the healthcare professional even though some patients found  
46 strong and consistent support by themselves outside the GP setting or in alternative settings.  
47 The main reasons for non-adherence was lack of trust in the dietician, and lack of trust in the  
48 e-health tool, which is in line with other studies examining reasons for noncompliance with e-  
49 health tools.<sup>23</sup>  
50

51 Goal setting and monitoring the behavioural change are important for many patients, but it  
52 needs to be delivered empathically and only when relevant. Goal-directed action is the basis  
53 of the social action theory<sup>10</sup> and, by using e-health tools, this can be done real-time both  
54 objectively (via accelerometers in smartphones, using apps such as Google Fit, Apple's built-in  
55  
56  
57  
58  
59

1  
2  
3  
4 Health app, or Endomondo) and subjectively through reporting. Lifestyle changes were often  
5 ignited by a specific event. This event could be intrinsic, from a perceived significant life event  
6 for the individuals or their close family, or extrinsic, such as an eye-opening talk with a health  
7 professional or an effective treatment that helped the patient decide that weight loss or other  
8 lifestyle changes were important enough to make a change.

9 Barriers centred around perceived insurmountable obstacles, lack of self-efficacy, and excess  
10 eating of high calorie foods, which very much related to the intrapersonal stream described in  
11 the Theory of Triadic Influence (TTI).<sup>11</sup> To close the gap and reach their goals despite these  
12 barriers, patients described how the support they experienced both offline and online from  
13 referent others made a huge difference. This interpersonal aspect is the second stream in TTI  
14 and confirms that meeting others in the same situation is important.

15  
16 The third stream in TTI is the sociocultural environment that changes to some extent when a  
17 person meets new people (including online) who also want to lose weight. That is, you can  
18 change your referent others (“friends”) online, something that might be of importance in the  
19 future, especially for people from lower social classes, with little support from home, or who  
20 live alone<sup>12</sup>. Many of the same psychological support elements via change of reference others  
21 are found in other successful lifestyle change groups such as Alcoholics Anonymous and/or  
22 Overeaters Anonymous. Lastly, close family play an important role for our participants. The  
23 participants all reported support from their family as important during their weight loss,  
24 which is in accordance with the social cognitive theory underlying the importance of the  
25 opinion of referent others.<sup>9</sup>  
26  
27

## 28 **Strengths and limitations of this study**

29 This is the first qualitative research study exploring drivers for successful long-term lifestyle  
30 change using a collaborative online e-health approach in general practice. The digital  
31 revolution makes it difficult to detect general principles for successful e-health tools before  
32 they are out-dated; instead, this qualitative study explores themes of importance across  
33 various persuasive technologies and collaborative e-health platforms that could not be  
34 highlighted in a quantitative study. It is a potential weakness that we do not know if our  
35 sample was more technically savvy than the average population, which should be addressed  
36 in future studies. On the other hand the access to new technologies becomes easier all the  
37 time why we believe the principles outlined in this applies study to most patients.

38 This study mainly included patients with successful long-term lifestyle change, meaning  
39 reasons for lack of engagement and non-adherence might have been overseen.

40 The study did not look at perspectives of individuals in relation to their outcomes; with more  
41 individuals and methodological triangulation, this might have revealed the quantitative  
42 importance of the identified themes. The result of this study is probably generalizable and  
43 supports the notion that the implementation of collaborative e-health tools might have the  
44 potential to change patient lifestyles via low-cost support for healthy living. The  
45 preconception of the authors’ CJB and JS, who are GPs, might have compromised the  
46 objectivity of the data in interviews and analysis, even though it was taken into account in the  
47 analysis. Future research needs to examine the perspectives of GPs and healthcare  
48 professionals who assist patients using collaborative e-health tools, in order to better  
49 understand the perspectives of all stakeholders.  
50  
51  
52  
53  
54

## 55 **CONCLUSION**

56 A strong relationship with a healthcare professional or another person with coaching ability is  
57 essential for long-term successful weight loss when using e-health tools. The collaborative e-  
58

1  
2  
3  
4 health tool can be viewed as a supplement to the professional empathic relationship and  
5 support behavioural change through monitoring and empathic, relevant feedback. The  
6 opinions of family and peers matter. Long-term success with lifestyle change depends on the  
7 ability to establish strong positive support on a day-to-day basis, which can be supported by  
8 e-health tools. The patient needs to feel that the healthcare professional cares for her/him if  
9 she/he is going to be successful with a long-term lifestyle change. The present findings are  
10 probably generalizable to the use of collaborative e-health tools and have formed the basis of  
11 the later development of a collaborative e-health tool using focus group interviews in a  
12 'thinking aloud' protocol where the patients interact with the app and healthcare  
13 professionals interact with the backend control panel,<sup>24</sup> that is going to be used in a future  
14 study.<sup>25</sup>  
15  
16  
17

#### Contributor statement:

18  
19 CJB, JC, JBN and JS have all contributed substantially to the conception and the design of the  
20 work, analysis and interpretation of data.

21 CJB, JC, JBN and JS have all been involved in drafting and revising the article critically for  
22 important intellectual content.

23 CJB, JC, JBN and JS have all approved the final version attached, will approve the final  
24 published version and agree to be accountable for all aspects of the work in ensuring that  
25 questions related to the accuracy or integrity of any part of the work are appropriately  
26 investigated and resolved.  
27  
28

#### Competing interest:

29  
30 Carl J. Brandt owns stock in LIVA Healthcare ApS, the company that has developed parts of the  
31 technical platform used by the patients in the pilot study.  
32  
33

#### Funding:

34  
35 The study has been partly funded by The Region of Southern Denmark, KEU project 07/10.  
36  
37

#### Data sharing statement:

38  
39 All 10 interviews can be provided in Danish upon request.  
40  
41

## REFERENCES

- 42  
43  
44 1. Hall KD, Kahan S. Maintenance of Lost Weight and Long-Term Management of Obesity. *The*  
45 *Medical clinics of North America* 2018;102(1):183-97. doi:  
46 10.1016/j.mcna.2017.08.012 [published Online First: 2017/11/21]  
47 2. Sriram U, Morgan EH, Graham ML, et al. Support and Sabotage: A Qualitative Study of Social  
48 Influences on Health Behaviors Among Rural Adults. *The Journal of rural health : official journal of the American Rural Health Association and the National Rural Health*  
49 *Care Association* 2017 doi: 10.1111/jrh.12232 [published Online First: 2017/01/04]  
50 3. Lupton D. The digitally engaged patient: Self-monitoring and self-care in the digital health  
51 era. *Social Theory & Health* 2013;11(3):256-70. doi: 10.1057/sth.2013.10  
52 4. Afshin A, Babalola D, Mclean M, et al. Information technology and lifestyle: a systematic  
53 evaluation of internet and mobile interventions for improving diet, physical activity,  
54 obesity, tobacco, and alcohol use. *Journal of the American Heart Association*  
55 2016;5(9):e003058. doi: 10.1161/JAHA.115.003058  
56  
57  
58  
59  
60

- 1  
2  
3  
4 5. Hartmann - Boyce J, Johns D, Jebb S, et al. Effect of behavioural techniques and delivery  
5 mode on effectiveness of weight management: systematic review, meta - analysis and  
6 meta - regression. *obesity reviews* 2014; 15(7).  
7 <https://www.ncbi.nlm.nih.gov/pmc/articles/PMC4237119/pdf/obr0015-0598.pdf>.
- 8  
9 6. Sherrington A, Newham J, Bell R, et al. Systematic review and meta - analysis of internet -  
10 delivered interventions providing personalized feedback for weight loss in overweight  
11 and obese adults. *Obesity Reviews* 2016
- 12 7. Lyons EJ, Lewis ZH, Mayrsohn BG, et al. Behavior change techniques implemented in  
13 electronic lifestyle activity monitors: a systematic content analysis. *Journal of medical*  
14 *Internet research* 2014;16(8) doi: 10.2196/jmir.3469
- 15 8. Levine DM, Savarimuthu S, Squires A, et al. Technology-assisted weight loss interventions in  
16 primary care: a systematic review. *Journal of general internal medicine*  
17 2015;30(1):107-17. doi: 10.1007/s11606-014-2987-6
- 18 9. Bandura A. Health promotion by social cognitive means. *Health education & behavior*  
19 2004;31(2):143-64. doi: 10.1177/1090198104263660
- 20 10. Ewart CK. Changing our unhealthy ways: Emerging perspectives from social action theory.  
21 *Emerging theories in health promotion practice and research* 2009;2:359-89.
- 22 11. Flay B, Snyder F, Petraitis J, et al. Emerging theories in health promotion practice and  
23 research: Jossey-Bass San Francisco, CA, 2009.
- 24 12. Winzelberg AJ, Classen C, Alpers GW, et al. Evaluation of an internet support group for  
25 women with primary breast cancer. *Cancer* 2003;97(5):1164-73. doi:  
26 10.1002/cncr.11174
- 27 13. Brandt V, Brandt CJ, Glintborg D, et al. Sustained weight loss during 20 months using a  
28 personalized interactive internet based dietician advice program in a general practice  
29 setting. *International Journal on Advances in Life Sciences* 2011; 3(1&2).
- 30 14. Haste A, Adamson AJ, McColl E, et al. Web-Based Weight Loss Intervention for Men With  
31 Type 2 Diabetes: Pilot Randomized Controlled Trial. *JMIR Diabetes* 2017;2(2):e14. doi:  
32 10.2196/diabetes.7430
- 33 15. Yip C, Han NR, Sng BL. Legal and ethical issues in research. *Indian journal of anaesthesia*  
34 2016;60(9):684-88. doi: 10.4103/0019-5049.190627 [published Online First:  
35 2016/10/13]
- 36 16. Kvale S, Brinkmann S. Interviews: Learning the Craft of Qualitative Research Interviewing.  
37 3rd ed. United States of America: SAGE 2015.
- 38 17. Malterud K. Qualitative research: standards, challenges, and guidelines. *The lancet*  
39 2001;358(9280):483-88.
- 40 18. Sandelowski M. Focus on research methods-whatever happened to qualitative  
41 description? *Research in nursing and health* 2000;23(4):334-40.
- 42 19. Hoffmann TC, Glasziou PP, Boutron I, et al. Better reporting of interventions: template for  
43 intervention description and replication (TIDieR) checklist and guide. *BMJ (Clinical*  
44 *research ed)* 2014;348:g1687. doi: 10.1136/bmj.g1687 [published Online First:  
45 2014/03/13]
- 46 20. Michie S, Ashford S, Sniehotta FF, et al. A refined taxonomy of behaviour change  
47 techniques to help people change their physical activity and healthy eating behaviours:  
48 the CALO-RE taxonomy. *Psychology & health* 2011;26(11):1479-98. doi:  
49 10.1080/08870446.2010.540664
- 50 21. Zoffmann V, Harder I, Kirkevold M. A person-centered communication and reflection  
51 model: sharing decision-making in chronic care. *Qualitative health research* 2008  
52 2008-01-25; 18(5).

- 1  
2  
3  
4 22. Moyers TB, Miller WR. Is low therapist empathy toxic? *Psychology of Addictive Behaviors*  
5 2013;27(3):878. doi: 10.1037/a0030274  
6 23. Lie SS, Karlsen B, Oord ER, et al. Dropout From an eHealth Intervention for Adults With  
7 Type 2 Diabetes: A Qualitative Study. *J Med Internet Res* 2017;19(5):e187. doi:  
8 10.2196/jmir.7479 [published Online First: 30.05.2017]  
9 24. LIVA 2017 [Available from: [www.livahealthcare.com](http://www.livahealthcare.com) accessed 10.12. 2017.  
10 25. Brandt CJ, Brandt V, Pedersen M, et al. Long-term effect of interactive online dietician  
11 weight loss advice in general practice (LIVA) protocol for a randomized controlled  
12 trial. *International journal of family medicine* 2014;2014 doi: 10.1155/2014/245347  
13  
14  
15  
16  
17  
18  
19  
20  
21  
22  
23  
24  
25  
26  
27  
28  
29  
30  
31  
32  
33  
34  
35  
36  
37  
38  
39  
40  
41  
42  
43  
44  
45  
46  
47  
48  
49  
50  
51  
52  
53  
54  
55  
56  
57  
58  
59  
60

## Appendix 1. (TiDieR) checklist<sup>a</sup> for the former Slankedoktor.dk - A web-based weight loss intervention

| TiDieR checklist item                                       | Description                                                                                                                                                                                                                                                                                                                                                                                                                                                                                                                                                                                                                                                                                                                                                                                                                                                                                                                                                                                                                                                                                                                                                                                                                                                                                                                                                                                                                                                                                                                                                                                                                                                                                                                                                                                                                                                                                                                                                                                                                                                                                                                                                                                                                                                                                                                                                                                                                                                     |
|-------------------------------------------------------------|-----------------------------------------------------------------------------------------------------------------------------------------------------------------------------------------------------------------------------------------------------------------------------------------------------------------------------------------------------------------------------------------------------------------------------------------------------------------------------------------------------------------------------------------------------------------------------------------------------------------------------------------------------------------------------------------------------------------------------------------------------------------------------------------------------------------------------------------------------------------------------------------------------------------------------------------------------------------------------------------------------------------------------------------------------------------------------------------------------------------------------------------------------------------------------------------------------------------------------------------------------------------------------------------------------------------------------------------------------------------------------------------------------------------------------------------------------------------------------------------------------------------------------------------------------------------------------------------------------------------------------------------------------------------------------------------------------------------------------------------------------------------------------------------------------------------------------------------------------------------------------------------------------------------------------------------------------------------------------------------------------------------------------------------------------------------------------------------------------------------------------------------------------------------------------------------------------------------------------------------------------------------------------------------------------------------------------------------------------------------------------------------------------------------------------------------------------------------|
| <b>What</b>                                                 | The dietician, who initially met the participating patient face-to-face in the doctor's office, also provided online lifestyle coaching using the interactive web-based weight loss program. To gain access to the e-health tool, the patient had to fill out a comprehensive document online covering his/her medical history, health status, educational level and medicine intake, and accept the sharing of data between the dietician, the doctor and an exercise coach. When consent was given, the patient had access to scheduled web-based consultations and dialog with the dietician and exercise coach through embedded email-style messages sent within the website, an online community "Forum for Debate", and an embedded e-mail chat that connected the patient with other patients participating in the study and with private users, who had purchased access to the service to lose weight in a non-clinical setting.                                                                                                                                                                                                                                                                                                                                                                                                                                                                                                                                                                                                                                                                                                                                                                                                                                                                                                                                                                                                                                                                                                                                                                                                                                                                                                                                                                                                                                                                                                                       |
| Online weight loss coaching by dietician and exercise coach | <p>The system was set up to notify the user when new feedback was available and the users could also communicate with other users using functions like comments on entries of food and physical activity inputs and personal pictures.</p> <p>To kick off the initial weight loss period lasting approximately four months, a personal diet plan and exercise plan, based on the first week of day-to-day online registrations of weight measurements, meals and physical activity, was provided to the patient. The subsequent online consultations with the dietician took place weekly. The content of these consultations was at the professional discretion of the health professionals, but overall the focus was on the patient's registrations and questions, information in relation to the patient's weight status and recommendations on how to perform specific behaviours and set new goals. The exercise coach could be consulted online every fourth week in the first four months. If deemed necessary by the dietician, a patient could see the dietician face-to-face in the doctor's office in between the scheduled online consultations, within the first two to three months of the study period. Overall, face-to-face consultations in the doctor's office with the dietician were planned to take place every third and sixth month.</p> <p>Included BCT<sup>b</sup> from the CALO-RE taxonomy<sup>c</sup> (hereafter referred to as BCT): provide feedback on performance; provide instruction on how to perform the behaviour; provide information on consequences of the behaviour in <i>general</i> and <i>to the individual</i>; goal setting: behaviour and outcome; action planning; barrier identification/problem solving; relapse prevention and coping planning; prompt practice; plan social support/social change)</p> <p>The inputs described underneath this column are available to the patient and are an important part of the intervention. The patients can keep record of specified behaviour(s) on a daily, weekly or monthly basis. If the patients make their registrations daily, it becomes possible for both the health professionals and the patient to follow progress or setbacks closely, as the numbers and registrations are visualized with graphs and curves. (BCT: goal setting: behaviour and outcome; prompt self-monitoring of behaviour; provide feedback on performance; prompt practice)</p> |
| Daily food intake input                                     | Reporting of daily food intake: type of foods, amounts and time consumed can be compared to the personal diet plan. This makes it possible to advise and support the patient in getting a more balanced diet, e.g. eating smaller meals throughout the day, getting more vegetables and fruit, less carbs, fat and sugar and choosing whole-grain options when possible. (BCT: provide feedback on performance; prompt self-monitoring of behaviour)                                                                                                                                                                                                                                                                                                                                                                                                                                                                                                                                                                                                                                                                                                                                                                                                                                                                                                                                                                                                                                                                                                                                                                                                                                                                                                                                                                                                                                                                                                                                                                                                                                                                                                                                                                                                                                                                                                                                                                                                            |

1  
2  
3  
4  
5  
6  
7  
8  
9  
10  
11  
12  
13  
14  
15  
16  
17  
18  
19  
20  
21  
22  
23  
24  
25  
26  
27  
28  
29  
30  
31  
32  
33  
34  
35  
36  
37  
38  
39  
40  
41  
42  
43  
44  
45  
46  
47  
48  
49  
50  
51  
52  
53  
54  
55  
56  
57  
58  
59  
60

|                           |                                                                                                                                                                                                                                                                                                                                                                                                                                                                                                          |
|---------------------------|----------------------------------------------------------------------------------------------------------------------------------------------------------------------------------------------------------------------------------------------------------------------------------------------------------------------------------------------------------------------------------------------------------------------------------------------------------------------------------------------------------|
| My healthy cookbook       | The patients can access and share recipes and links to websites with healthy cooking instructions among each other, the feature is supervised by the dietician on request. (BCT: prompt practice; facilitate social comparison)                                                                                                                                                                                                                                                                          |
| Physical activity input   | Recording of type, time and intensity of any physical activity. The patients are taught how to set realistic goals and receive advice on different activities and how to implement them in daily life. They also learn how to convert activity into calories burnt, to get a better understanding of the balance between energy intake and energy output. (BCT: provide instruction on how to perform the behaviour; prompting generalization of a target behaviour; relapse prevention/coping planning) |
| Weight measurements input | Recording of current weight and goal weight, and reporting of waist measurements to display progress. The patients are instructed on how to do the measurements at the same time and in the same way every day. (BCT: prompt self-monitoring of behaviour and behavioural outcomes; provide feedback on performance)                                                                                                                                                                                     |
| Forum for debate          | Online community for users with a weight problem. The forum made it possible to exchange knowledge, gain social support from peers and build new relationships. The health professionals could also give advice to the forum users and encourage them to contact each other for support (BCT: planning social support/social change)                                                                                                                                                                     |
| <b>Who provided</b>       | Professional dietician and exercise coach                                                                                                                                                                                                                                                                                                                                                                                                                                                                |
| <b>How</b>                | Individually delivered via the e-health tool                                                                                                                                                                                                                                                                                                                                                                                                                                                             |
| <b>Where</b>              | Initial face-to-face meetings between the participating patient, their personal doctor and the dietician in the doctor's office. Then mainly web-based delivery.                                                                                                                                                                                                                                                                                                                                         |
| <b>When and how much</b>  | The initial face-to-face consultation with the dietician lasted approx. 45-60 minutes. Thereafter, in a four to six-month period, asynchronous web-based consultations were carried out once weekly with the dietician and every fourth week with the exercise coach. Thereafter (maintenance period), it was possible for both the patient and the dietician to request web-based consultations, typically monthly. (BCT: use of follow up prompts)                                                     |
| <b>Tailoring</b>          | Every participating patient received personalized web-based consultations from their designated dietician and exercise coach based on the patient's own inputs online.                                                                                                                                                                                                                                                                                                                                   |
| <b>Modifications</b>      | Only minor modifications were made during the study.                                                                                                                                                                                                                                                                                                                                                                                                                                                     |

---

<sup>a</sup> Based on Hoffmann et al 2014 <sup>18</sup>

<sup>b</sup>BCT: behaviour change techniques.

<sup>c</sup>CALO-RE: Coventry, Aberdeen and London-Refined taxonomy<sup>19</sup>



**Table 1**

Consolidated criteria for reporting qualitative studies (COREQ): 32-item checklist

| No                                   | Item                                     | Guide questions/description                                                                                                                                     | Page |
|--------------------------------------|------------------------------------------|-----------------------------------------------------------------------------------------------------------------------------------------------------------------|------|
| <b>Domain 1:</b>                     |                                          |                                                                                                                                                                 |      |
| <b>Research team and reflexivity</b> |                                          |                                                                                                                                                                 |      |
| Personal Characteristics             |                                          |                                                                                                                                                                 |      |
| 1.                                   | Interviewer/facilitator                  | Which author/s conducted the interview or focus group?                                                                                                          | 4    |
| 2.                                   | Credentials                              | What were the researcher's credentials? <i>E.g. PhD, MD</i>                                                                                                     | 1    |
| 3.                                   | Occupation                               | What was their occupation at the time of the study?                                                                                                             | 1    |
| 4.                                   | Gender                                   | Was the researcher male or female? Male: CJB,JS, JBN. Female: JC                                                                                                |      |
| 5.                                   | Experience and training                  | What experience or training did the researcher have?                                                                                                            | 1    |
| Relationship with participants       |                                          |                                                                                                                                                                 |      |
| 6.                                   | Relationship established                 | Was a relationship established prior to study commencement?                                                                                                     | 4    |
| 7.                                   | Participant knowledge of the interviewer | What did the participants know about the researcher? <i>e.g. personal goals, reasons for doing the research</i>                                                 | 4    |
| 8.                                   | Interviewer characteristics              | What characteristics were reported about the interviewer/facilitator? <i>e.g. Bias, assumptions, reasons and interests in the research topic</i>                | 4    |
| <b>Domain 2: study design</b>        |                                          |                                                                                                                                                                 |      |
| Theoretical framework                |                                          |                                                                                                                                                                 |      |
| 9.                                   | Methodological orientation and Theory    | What methodological orientation was stated to underpin the study? <i>e.g. grounded theory, discourse analysis, ethnography, phenomenology, content analysis</i> | 5    |
| Participant selection                |                                          |                                                                                                                                                                 |      |
| 10.                                  | Sampling                                 | How were participants selected? <i>e.g. purposive, convenience, consecutive, snowball</i>                                                                       | 3    |
| 11.                                  | Method of approach                       | How were participants approached? <i>e.g. face-to-face, telephone, mail, email</i>                                                                              | 3    |
| 12.                                  | Sample size                              | How many participants were in the study?                                                                                                                        | 3    |
| 13.                                  | Non-participation                        | How many people refused to participate or dropped out? Reasons?                                                                                                 | 3    |
| Setting                              |                                          |                                                                                                                                                                 |      |
| 14.                                  | Setting of data collection               | Where was the data collected? <i>e.g. home, clinic, workplace</i>                                                                                               | 4    |
| 15.                                  | Presence of non-participants             | Was anyone else present besides the participants and researchers?                                                                                               | 4    |
| 16.                                  | Description of sample                    | What are the important characteristics of the sample? <i>e.g. demographic data, date</i>                                                                        | 3    |
| Data collection                      |                                          |                                                                                                                                                                 |      |
| 17.                                  | Interview guide                          | Were questions, prompts, guides provided by the authors? Was it pilot tested?                                                                                   | 5    |
| 18.                                  | Repeat interviews                        | Were repeat interviews carried out? If yes, how many?                                                                                                           | 5    |
| 19.                                  | Audio/visual recording                   | Did the research use audio or visual recording to collect the data?                                                                                             | 5    |

1  
2  
3  
4  
5  
6  
7  
8  
9  
10  
11  
12  
13  
14  
15  
16  
17  
18  
19  
20  
21  
22  
23  
24  
25  
26  
27  
28  
29  
30  
31  
32  
33  
34  
35  
36  
37  
38  
39  
40  
41  
42  
43  
44  
45  
46  
47  
48  
49  
50  
51  
52  
53  
54  
55  
56  
57  
58  
59  
60

| No                                          | Item                           | Guide questions/description                                                                                                                 | Page       |
|---------------------------------------------|--------------------------------|---------------------------------------------------------------------------------------------------------------------------------------------|------------|
| 20.                                         | Field notes                    | Were field notes made during and/or after the interview or focus group?                                                                     | 5          |
| 21.                                         | Duration                       | What was the duration of the interviews or focus group?                                                                                     | 4          |
| 22.                                         | Data saturation                | Was data saturation discussed?                                                                                                              | 5          |
| 23.                                         | Transcripts returned           | Were transcripts returned to participants for comment and/or correction?                                                                    | 5          |
| <b>Domain 3:<br/>analysis and findingsz</b> |                                |                                                                                                                                             |            |
| Data analysis                               |                                |                                                                                                                                             |            |
| 24.                                         | Number of data coders          | How many data coders coded the data?                                                                                                        | 5          |
| 25.                                         | Description of the coding tree | Did authors provide a description of the coding tree?                                                                                       | 5          |
| 26.                                         | Derivation of themes           | Were themes identified in advance or derived from the data?                                                                                 | 5          |
| 27.                                         | Software                       | What software, if applicable, was used to manage the data?                                                                                  | 5          |
| 28.                                         | Participant checking           | Did participants provide feedback on the findings?                                                                                          | 5          |
| Reporting                                   |                                |                                                                                                                                             |            |
| 29.                                         | Quotations presented           | Were participant quotations presented to illustrate the themes / findings?<br>Was each quotation identified? e.g. <i>participant number</i> | 6, 7, 8, 9 |
| 30.                                         | Data and findings consistent   | Was there consistency between the data presented and the findings?                                                                          | 5          |
| 31.                                         | Clarity of major themes        | Were major themes clearly presented in the findings?                                                                                        | 6          |
| 32.                                         | Clarity of minor themes        | Is there a description of diverse cases or discussion of minor themes?                                                                      | 9, 10      |
